# Supplementary material
Source: PubMed Central journal article supplement (PMC5882533)
Supplement: NIHMS939555-supplement-1.pdf [file NIHMS939555-supplement-1.pdf]

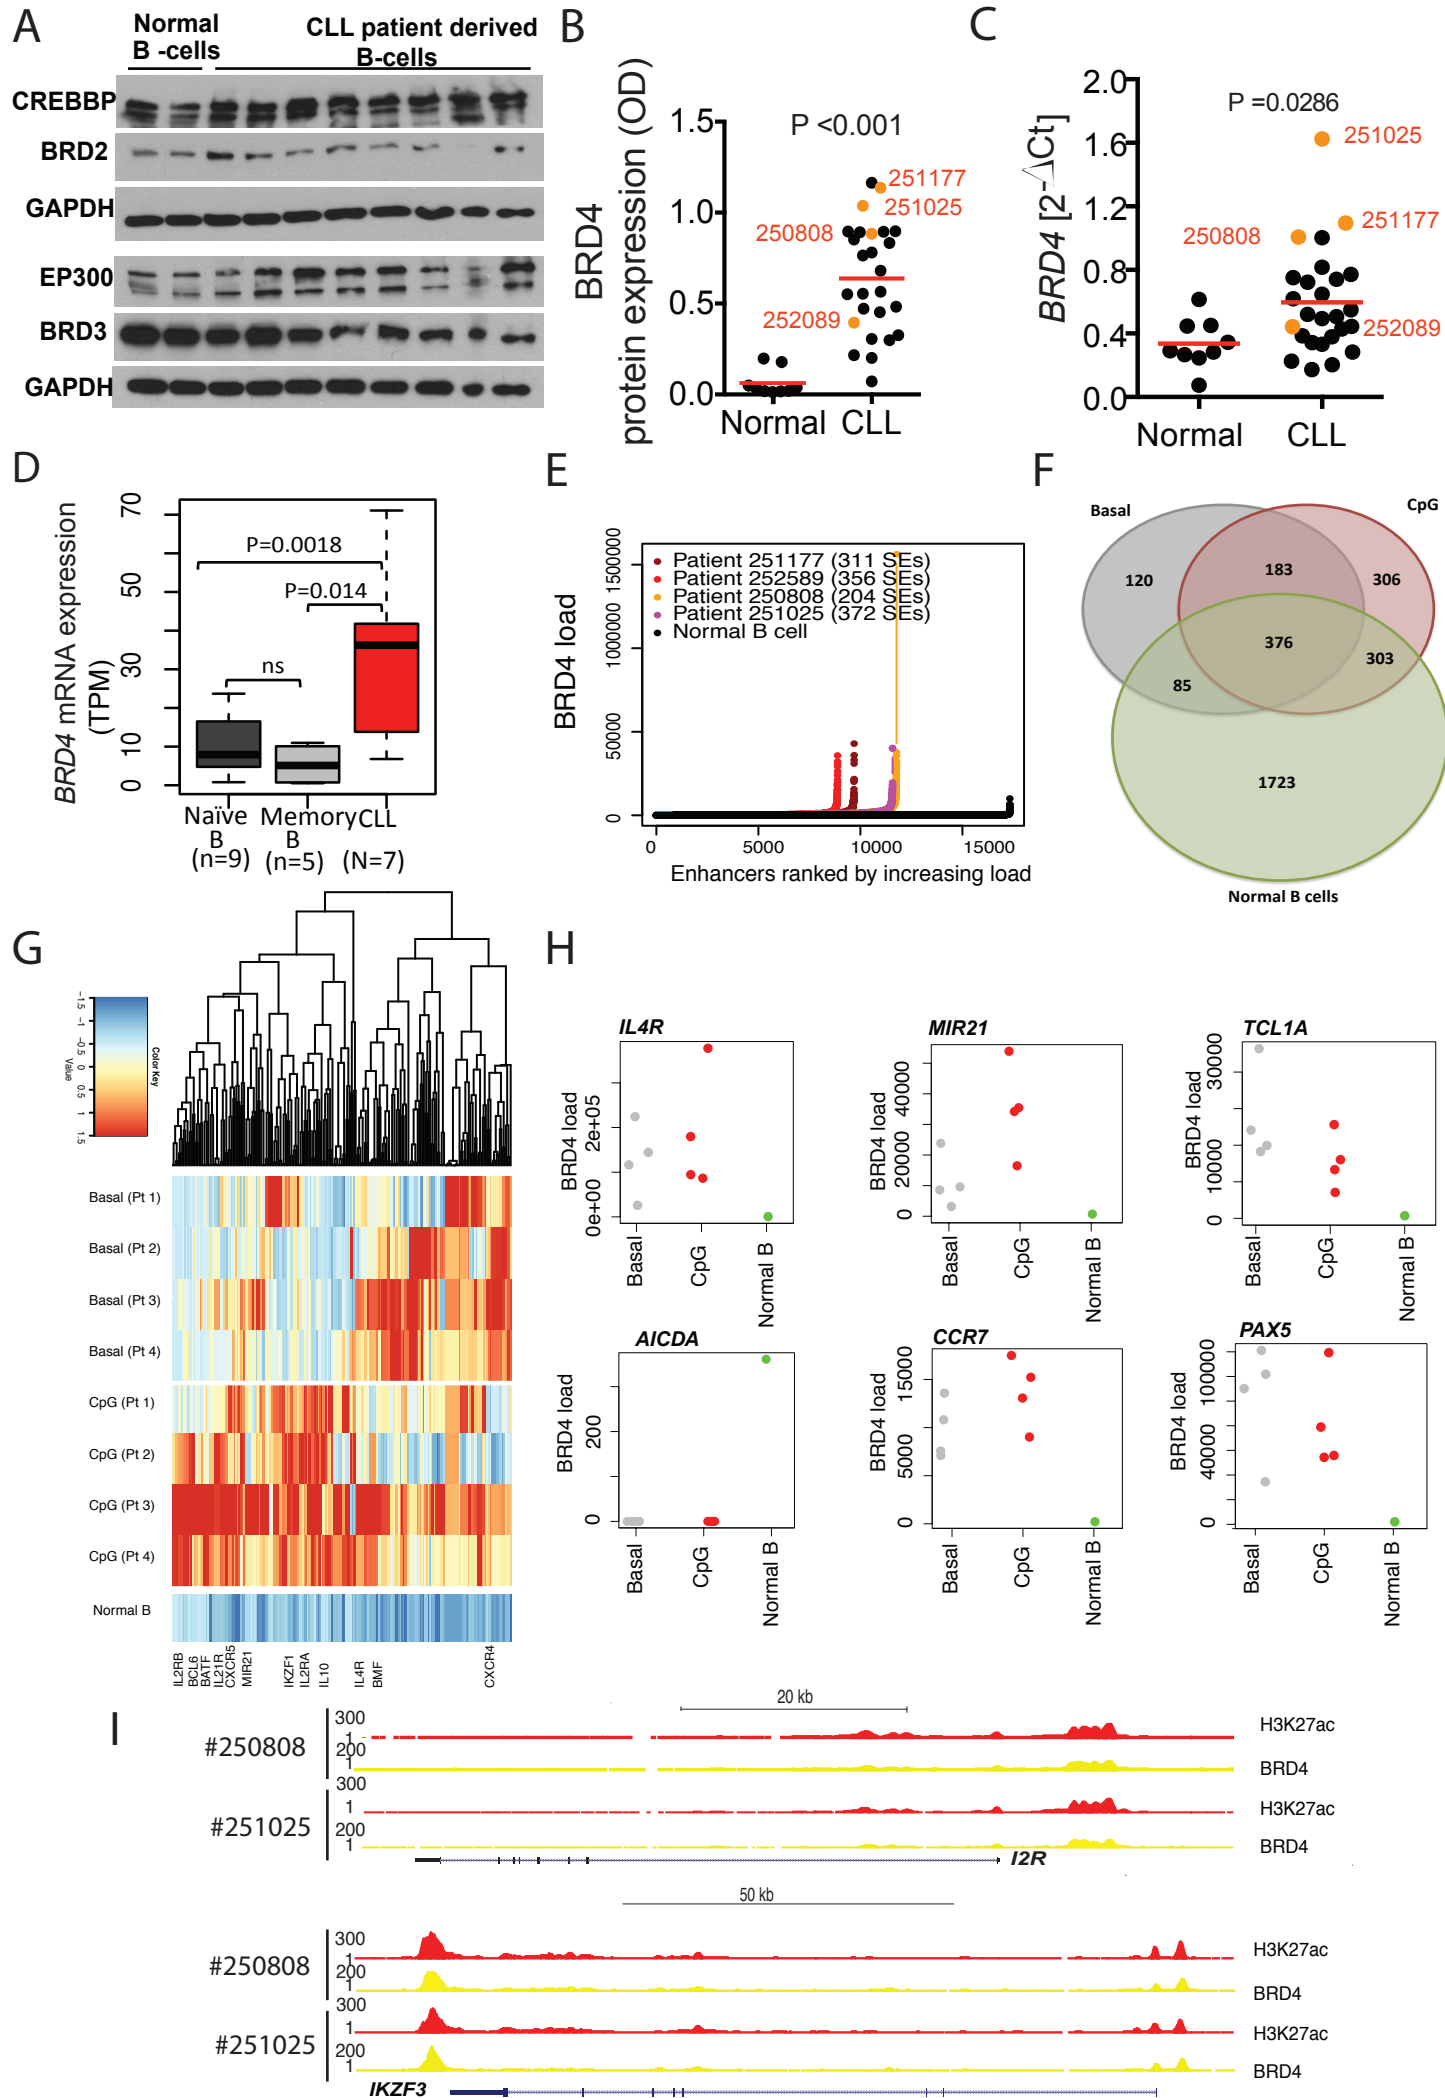

Figure S1

**Figure S1:** **A.** Representative immunoblot analysis of *CREBBP*, *BRD2*, *EP300*, *BRD3* and *GAPDH* in normal B-cells and CLL patient-derived B-cells. **B.** Protein expression quantification in B-cells isolated from normal donors (n=9) or CLL patients (n=26). Orange dots represent the four cases used or ChIP-seq studies; **C** *BRD4* transcript level in B-cells isolated from normal donors (n=9) or CLL patients (n=26), normalized to *GAPDH*. Red lines represent averages. Orange dots represents the four CLL cases used for ChIP-analysis; **D.** Boxplot showing the expression level distributions (transcript parts per million, TPM) of *BRD4* in patient's derived primary CLL cells and normal B cells (GEO study GSE42262, sample GSM1036401); **E.** Hockey stick plot for BRD4 load across enhancers of four CLL patient cells and a normal B cell line. SEs are defined as enhancers surpassing the inflection point; **F.** Venn diagram of SEs for primary CLL cells (basal and CpG stimulated conditions); **G.** Heatmap showing BRD4 load (total of reads per million per base pair) of SEs that are common for the four analyzed CLL samples (at least 3 out of 4) under basal or CpG stimulate conditions but not in normal B cell line; **H.** BRD4 load at super-enhancers of selected genes know to be either up-regulated (*IL4R*, *MIR21*, *TCL1A*, *CCR7*, and *PAX5*) or down-regulated (*AICDA*) in CLL compared to normal B cells with known prominent roles in tumor biology; **I.** Gene tracks of H3K27ac (red) and BRD4 (yellow) occupancy in primary CLL cells. The x-axis shows genomic position and y-axis shows signal of ChIP-seq occupancy in units of rpm/bp.

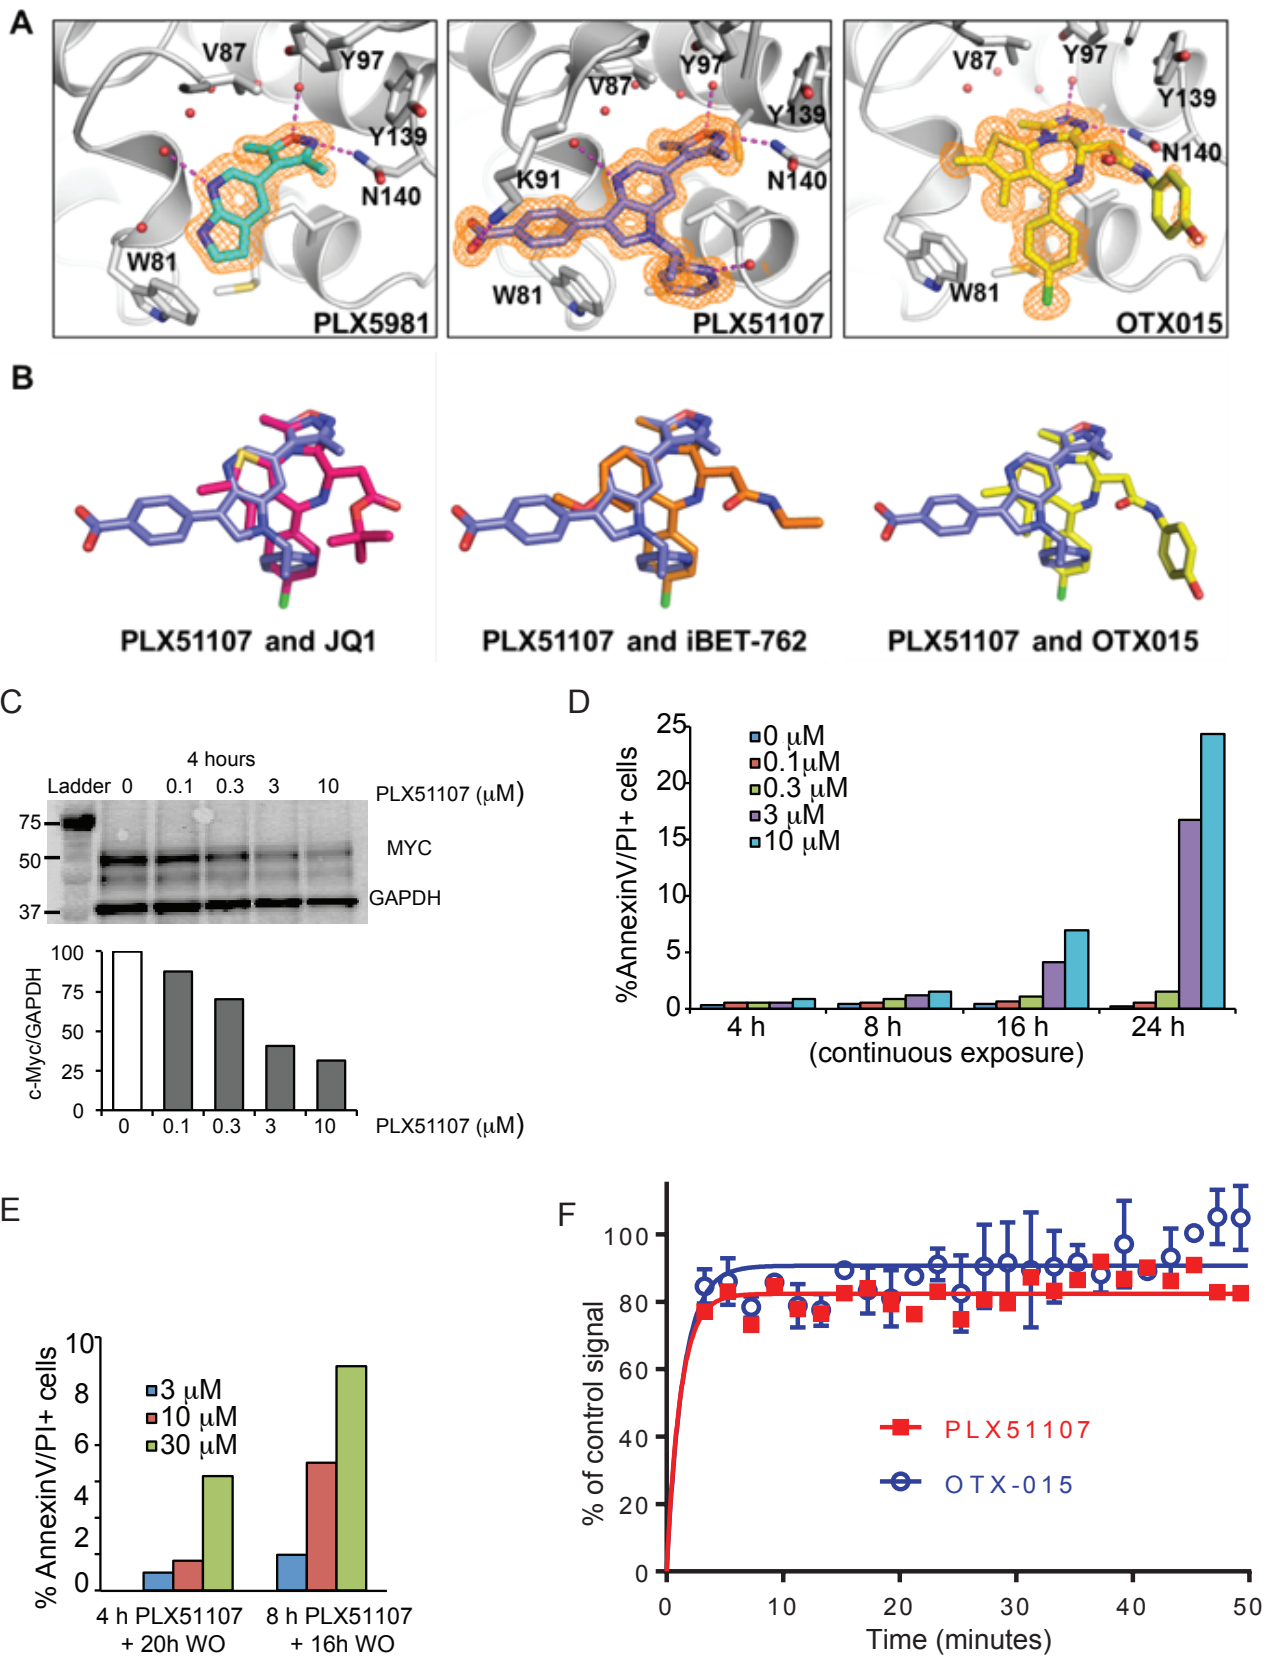

Figure S2

|          | $t_{1/2}(\text{min})$ | Apparent $K_{\text{off}} (\text{min}^{-1})$ |
|----------|-----------------------|---------------------------------------------|
| PLX51107 | < 3.25                | > 0.213                                     |
| OTX-015  | < 3.25                | > 0.213                                     |

**Figure S2: Co-structures with different BRD4 inhibitors. A.** A  $F_o-F_c$  omit map contoured at  $+3\sigma$  level for PLX5981, PLX51107 and OTX015. The inhibitors and key residues at the active site are shown in stick model.  $F_o-F_c$  omit maps were calculated using the refined coordinates of the structures excluding the ligands; **B.** Overlay of PLX51107 (purple) with JQ1 (red; PDB: 3MXF), i-BET762 (orange; PDB: 3P5O) and OTX015 (yellow). **(C-F):** Effect of exposure time on PLX51107 pharmacodynamic markers and the determination of compound residence times. **C.** Short term (4 hours) PLX51107 treatment at 3 and 10  $\mu\text{M}$  concentrations resulted in robust downregulation of c-Myc in MV4-11 cells (GAPDH was used as loading control). **D.** AnnexinV/PI flow cytometric analysis of MV4-11 cells treated with PLX51107 continuously for 4, 8, 16, and 24 hours. Significant apoptosis was observed at 3 and 10  $\mu\text{M}$  only after prolonged incubation. **E.** AnnexinV/PI flow cytometric analysis of MV4-11 cells treated with PLX51107 for 2, 4 or 8 hours followed by a washout period of 22, 20, or 16 hours (i.e. cytometric analysis was conducted 24 hours after treatment initiation in all cases). Two representative dot plots are shown. **F.** Off-rate measurement of PLX51107 and OTX-015 using a time-resolved fluorescence resonance energy transfer (TR-FRET) assay. Compound incubations were performed with 0.3  $\mu\text{M}$  GST-BRD4 (containing BD1 and BD2), 0.3  $\mu\text{M}$  Eu-anti-GST antibody, and 1.5  $\mu\text{M}$  of the test compounds.



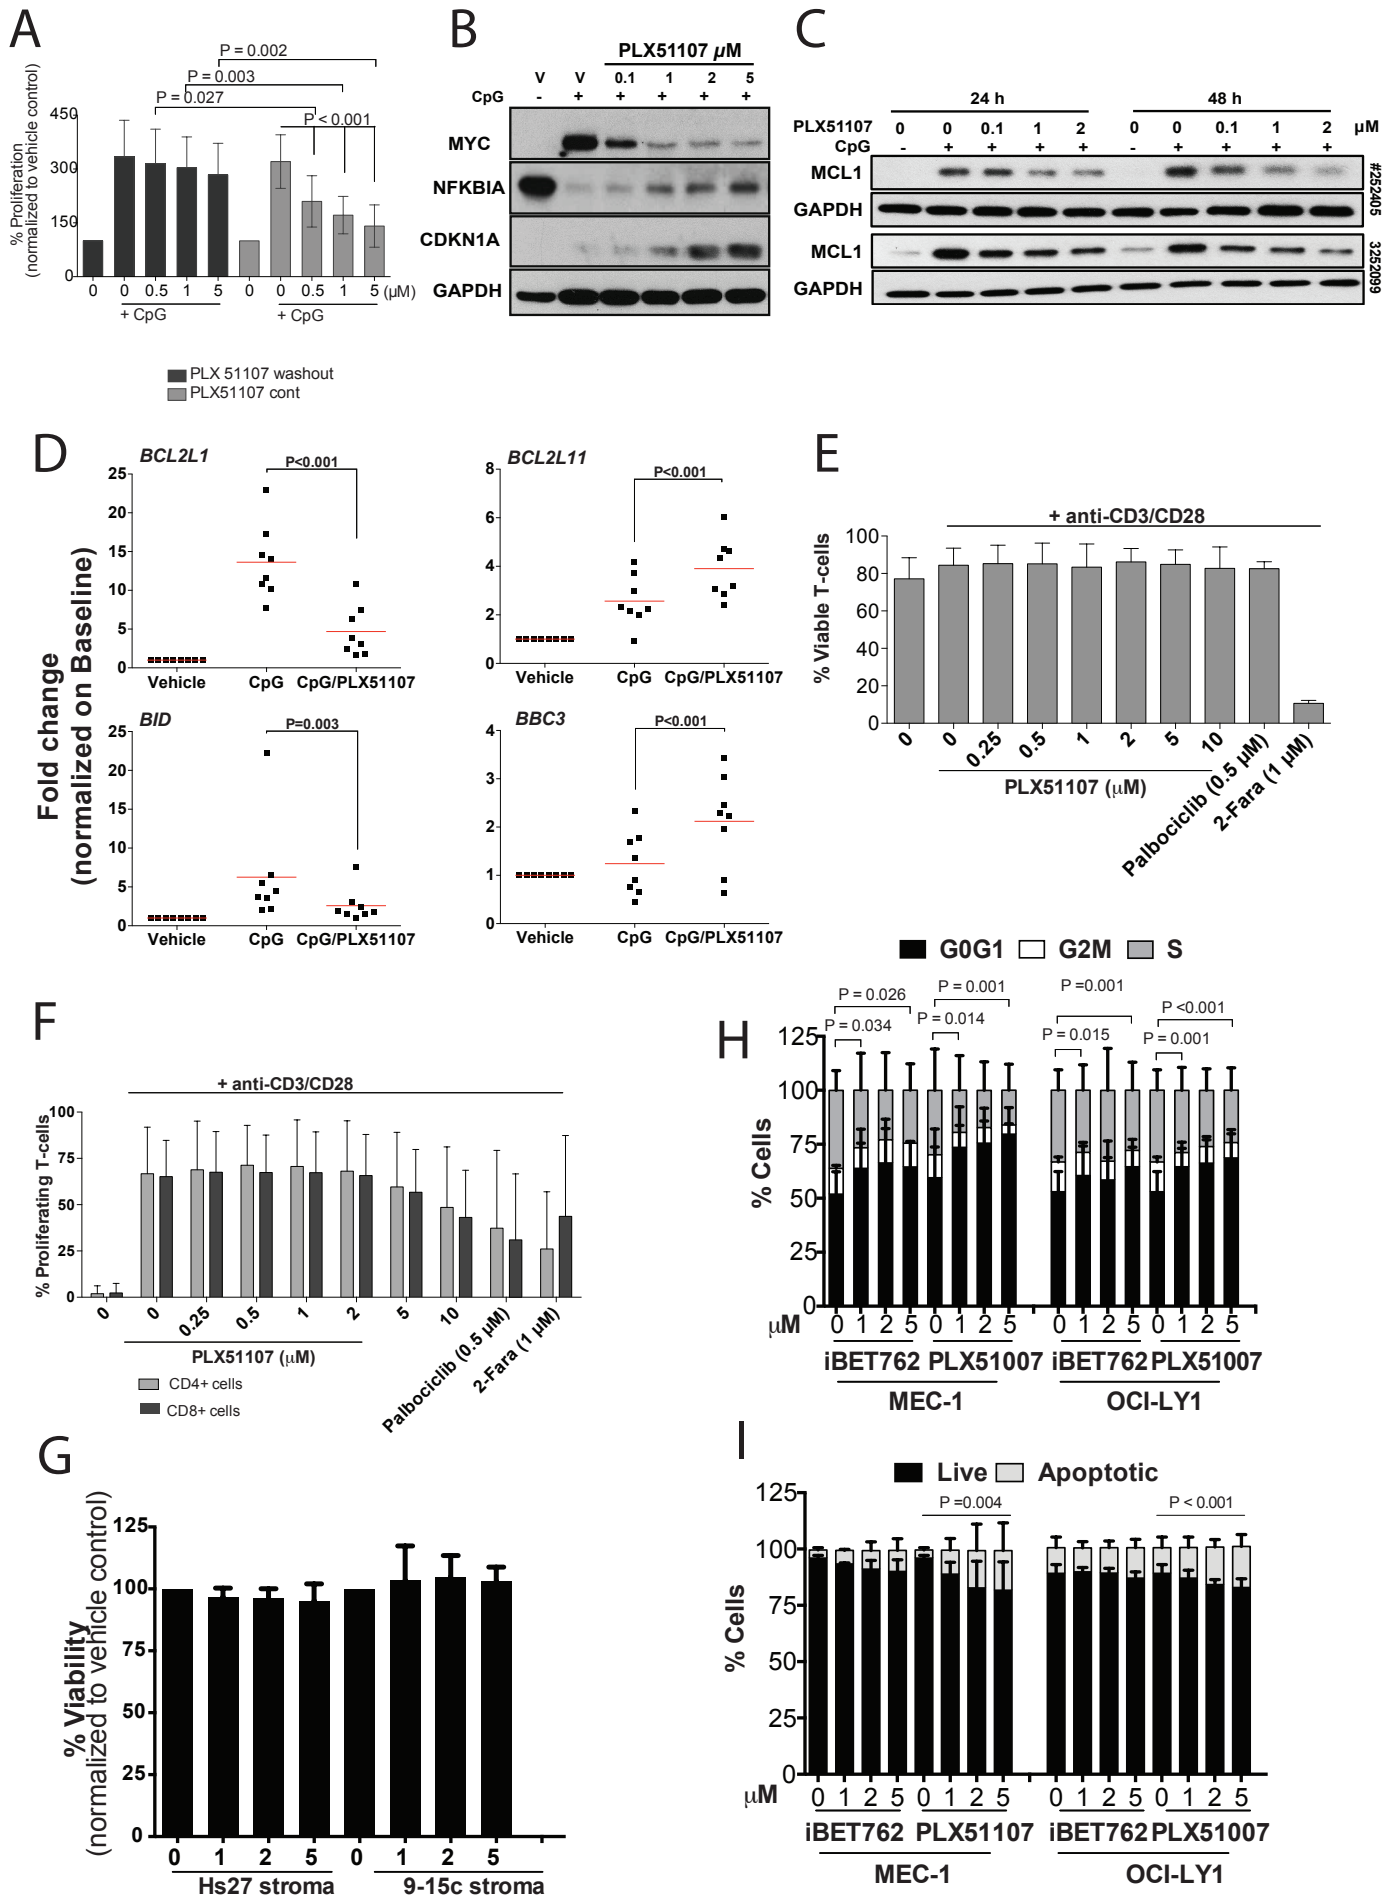

Figure S3

**Figure S3: BET inhibition attenuates CpG-induced survival effects in CLL.** **A.** Dose-dependent decrease of proliferation of CpG stimulated normal B cells upon BRD4 inhibition with increasing doses of PLX51107 for 4h followed by 44h washout or 48h continuously; (n=5); **B.** Representative immunoblot analysis of cMYC, I $\kappa$ B $\alpha$ , CDKN1A and GAPDH following PLX51107 treatment (0.1, 1, 2 or 5  $\mu$ M) in CpG-stimulated CLL cells (4h, n=3); **C.** Representative immunoblot analyses of the antiapoptotic protein, MCL1 following PLX51107 treatment of CpG stimulated B-CLL cells (24 and 48h, n=5) GAPDH is used as loading control; **D.** Quantitative real time-PCR analysis of the indicated apoptosis-related genes in primary B-CLL cells following PLX51107 treatment (1 $\mu$ M, 4 h) under stimulated conditions with 3.2  $\mu$ M CpG oligonucleotides (n=8). Red lines represent averages; **E-F.** Flow cytometric analysis of the effect of PLX51107 on T-cell viability and proliferation. Freshly isolated CD3 T-cells from healthy donors were stimulated by plate bound anti-CD3 and soluble anti-CD28 (+ anti-CD3/CD28) and treated with vehicle DMSO or increasing concentrations of PLX51107 as indicated. Palbociclib (0.5-1  $\mu$ M) and Fludarabine (2-Fara, 1/5  $\mu$ M) were used as control drugs to inhibit proliferation and viability, respectively. (E) T-cell viability was evaluated following a 4-day treatment using the LIVE/DEAD Fixable near-IR stain. Results are shown as Mean  $\pm$  SD (n=3-7); (F) CD4 and CD8 T-cell were investigated for CFSE dilution resulting from proliferation at the indicated time points and treatment conditions. Gates were set on viable CD4 or CD8 T-cells that underwent at least 1 cellular division and results are shown as % proliferating T-cells (Mean +) (**F**); **G.** Human Hs27 or murine 9-15c bone marrow-derived stroma cells were treated with increasing concentrations of PLX51107 for 72 h. Effects on proliferation were determined by MTS assay and represented as % of vehicle control. Results shown as mean  $\pm$  SD of n=3 independent experiments per cell line; **H.** Cell cycle analysis demonstrates accumulation of cells in G0/G1 phase in malignant B-cell lines following treatment with iBET762 or PLX51107 (1, 2 or 5  $\mu$ M) at 72h (n=3). Results shown as Mean  $\pm$  SD (n=3-4); **I.** Annexin/PI flow cytometric analysis of malignant B-cell lines treated with BRD4i, iBET-762 or PLX51107 (1, 2 or 5  $\mu$ M) at 72h (n=4).

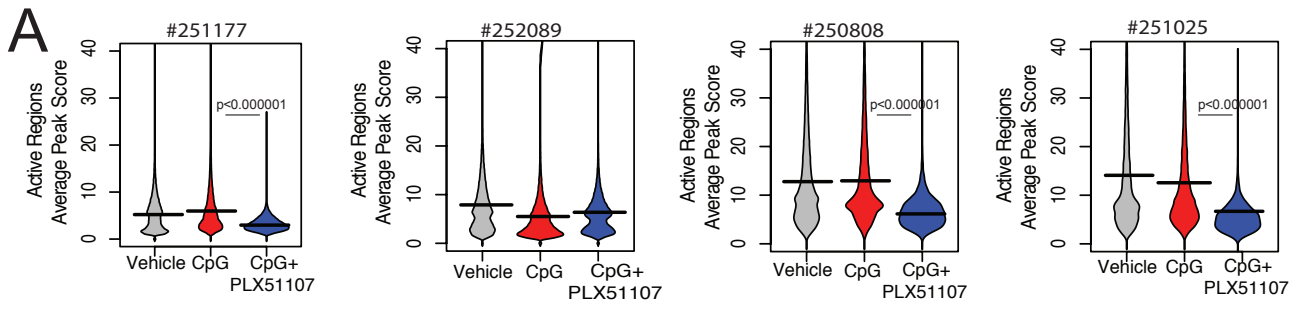

**B**

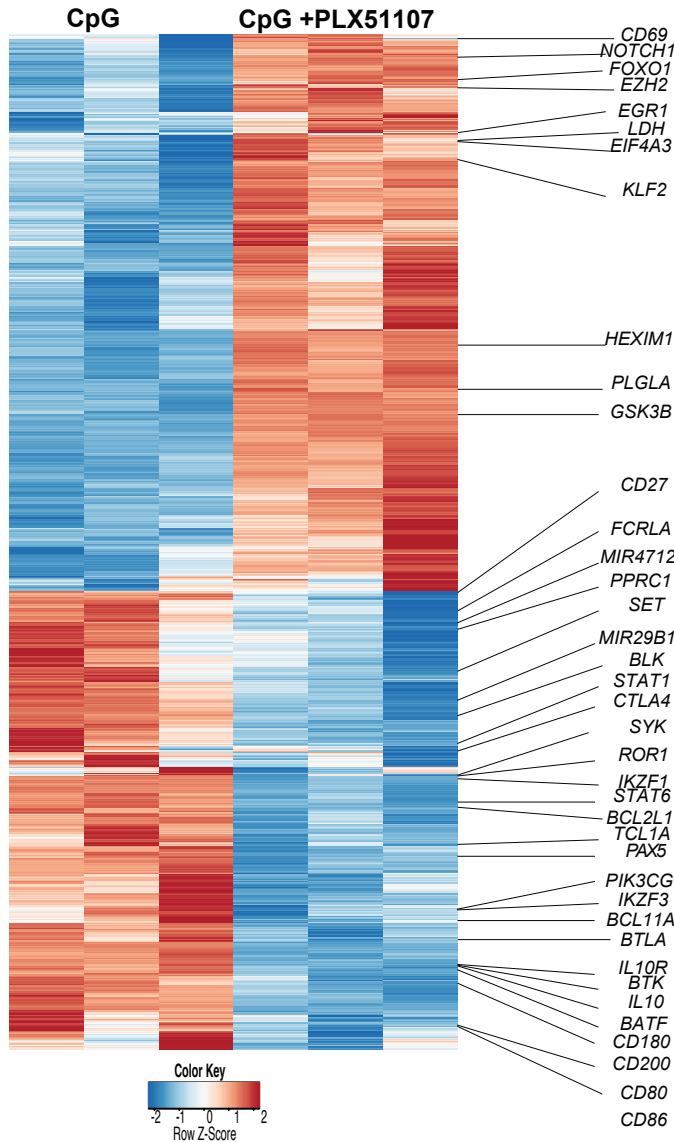

**C**

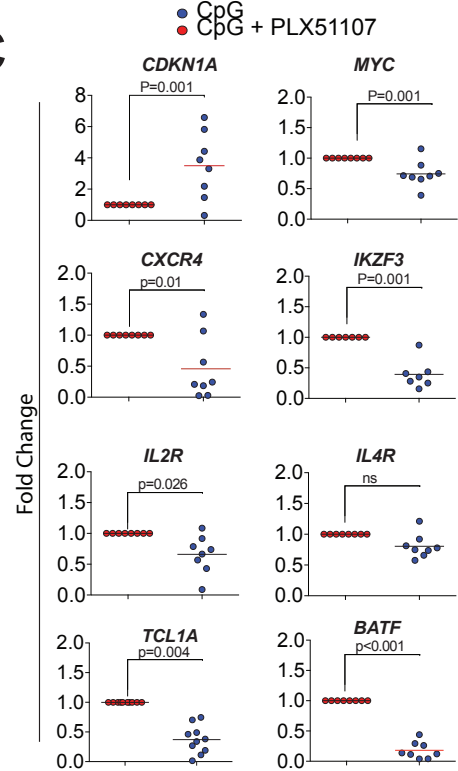

**E**

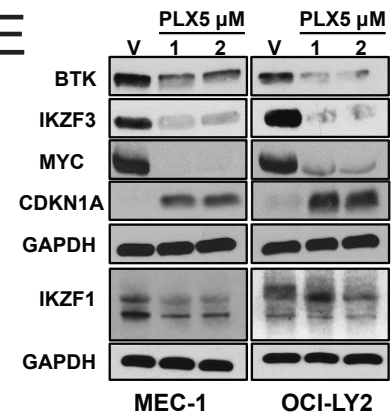

**D**

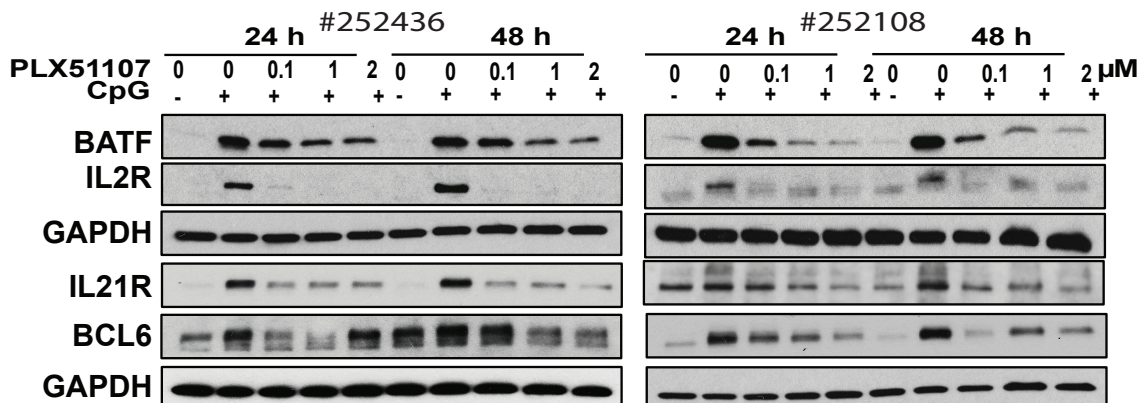

Figure S4

**Figure S4:** **A.** Bean plots showing global distribution of BRD4 peak scores at active regions following 4h treatment of primary CLL cells (a = vehicle, b = 3.2  $\mu$ M CpG stimulation, c = CpG stimulation + PLX51107, horizontal bars mark the mean scores); **B.** Heatmap of 1361 differentially expressed genes (745 up and 616 down regulated) with absolute fold change of 2 or more and p-value less than 0.01 upon BRD4 inhibition in microarray data. Microarray analysis using GeneChip Human Transcriptome Array HTA 2.0 (Affymetrix<sup>®</sup>) was performed in patient-derived CLL cells stimulated with CpG oligonucleotides (3.2  $\mu$ M) and treated with either vehicle (VEH/CpG) or 1  $\mu$ M PLX51107 (PLX5/CpG) for 4 h. Experiments were performed as triplicates, each representing a pool of 2-3 CLL patient samples each; **C.** Quantitative real time-PCR analysis of the selected genes in PLX51107 treated CpG-stimulated CLL patient-derived B-cells (n=8-10). Red lines represent averages; **D.** of protein levels of BATF, IL2R, IL21R, BCL6, and GAPDH following PLX51107 treatment (0.1, 1, or 2  $\mu$ M) in CpG-stimulated patient-derived CLL cells (24 and 48 h, n=5); **E.** Representative immunoblot analyses of relative protein levels of BTK, IKZF3, MYC, CDKN1A, IKZF1 and GAPDH following treatment with vehicle (V) or PLX51107 (PLX5: 1 or 2  $\mu$ M, 72 h) in three B-cell malignant cell lines (MEC-1, OCI-LY1).

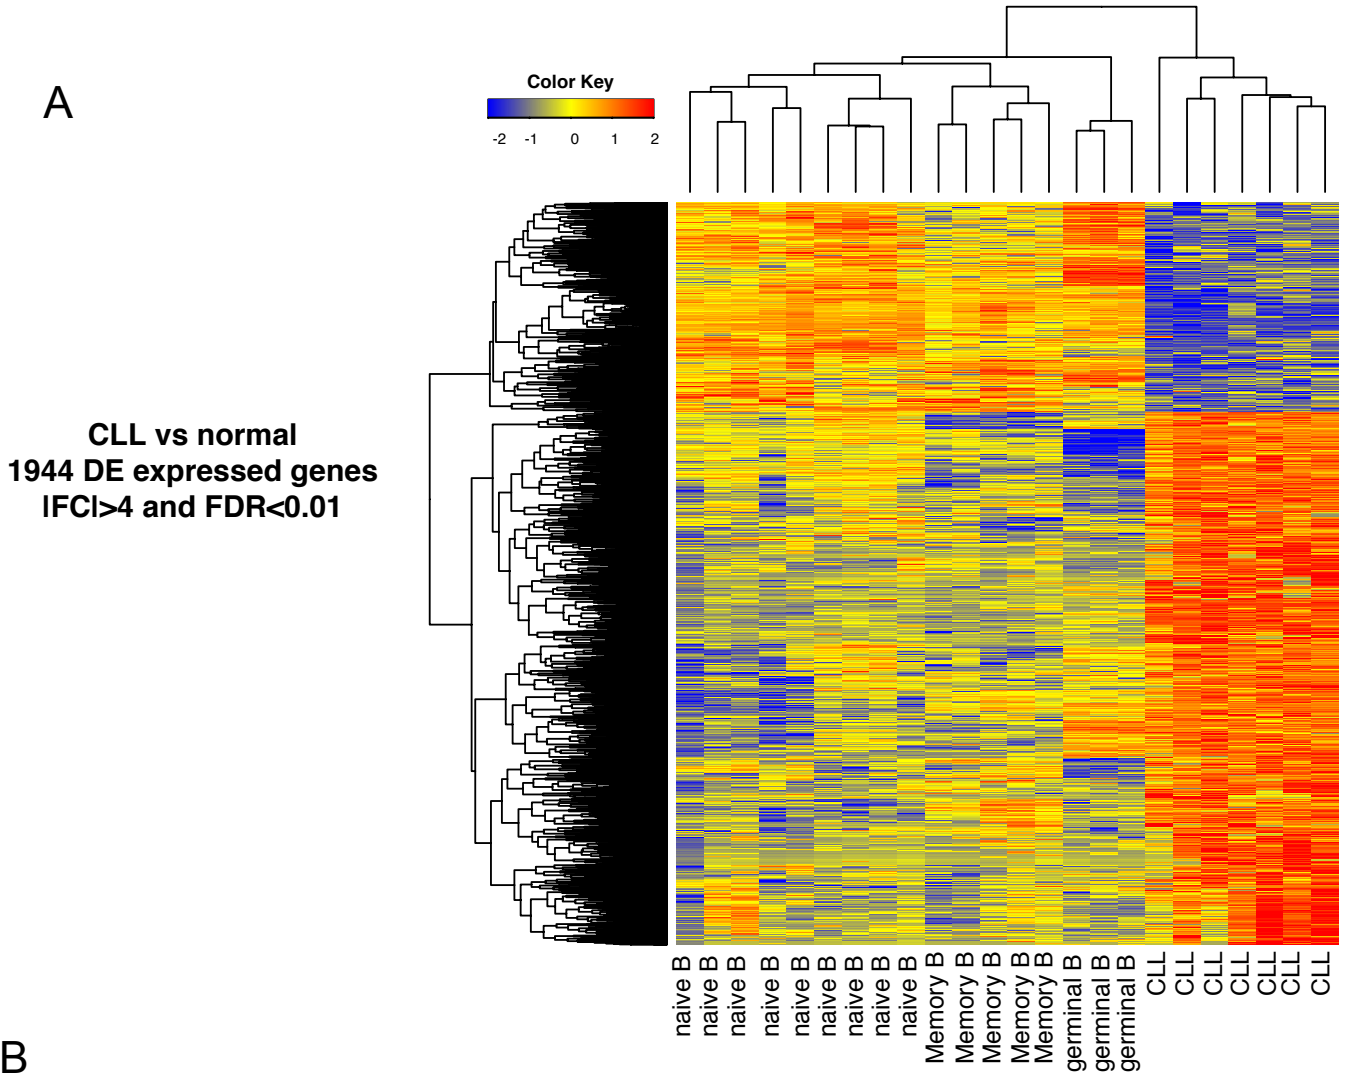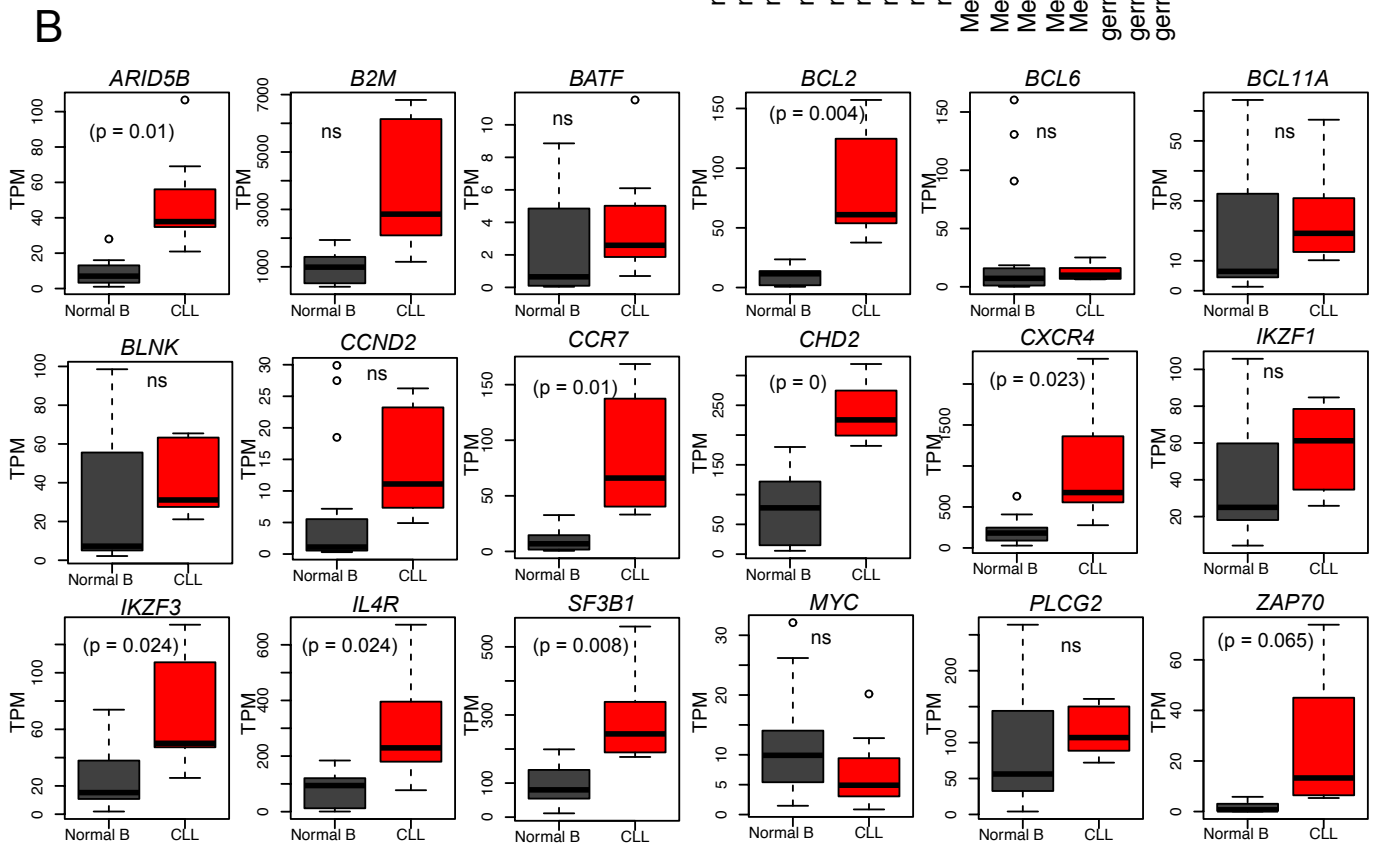

Figure S5

**Figure S5. A. Differential gene expression profile in CLL compared to normal B cells.** Heatmap of 1944 differentially expressed genes (with absolute fold change of 4 or more and p-value less than 0.01 in CLL compared to normal B cells in RNA-seq data; **B.** Boxplot showing the expression level distributions (transcript parts per million, TPM) for patients derived primary CLL cells and normal B cells for select genes.

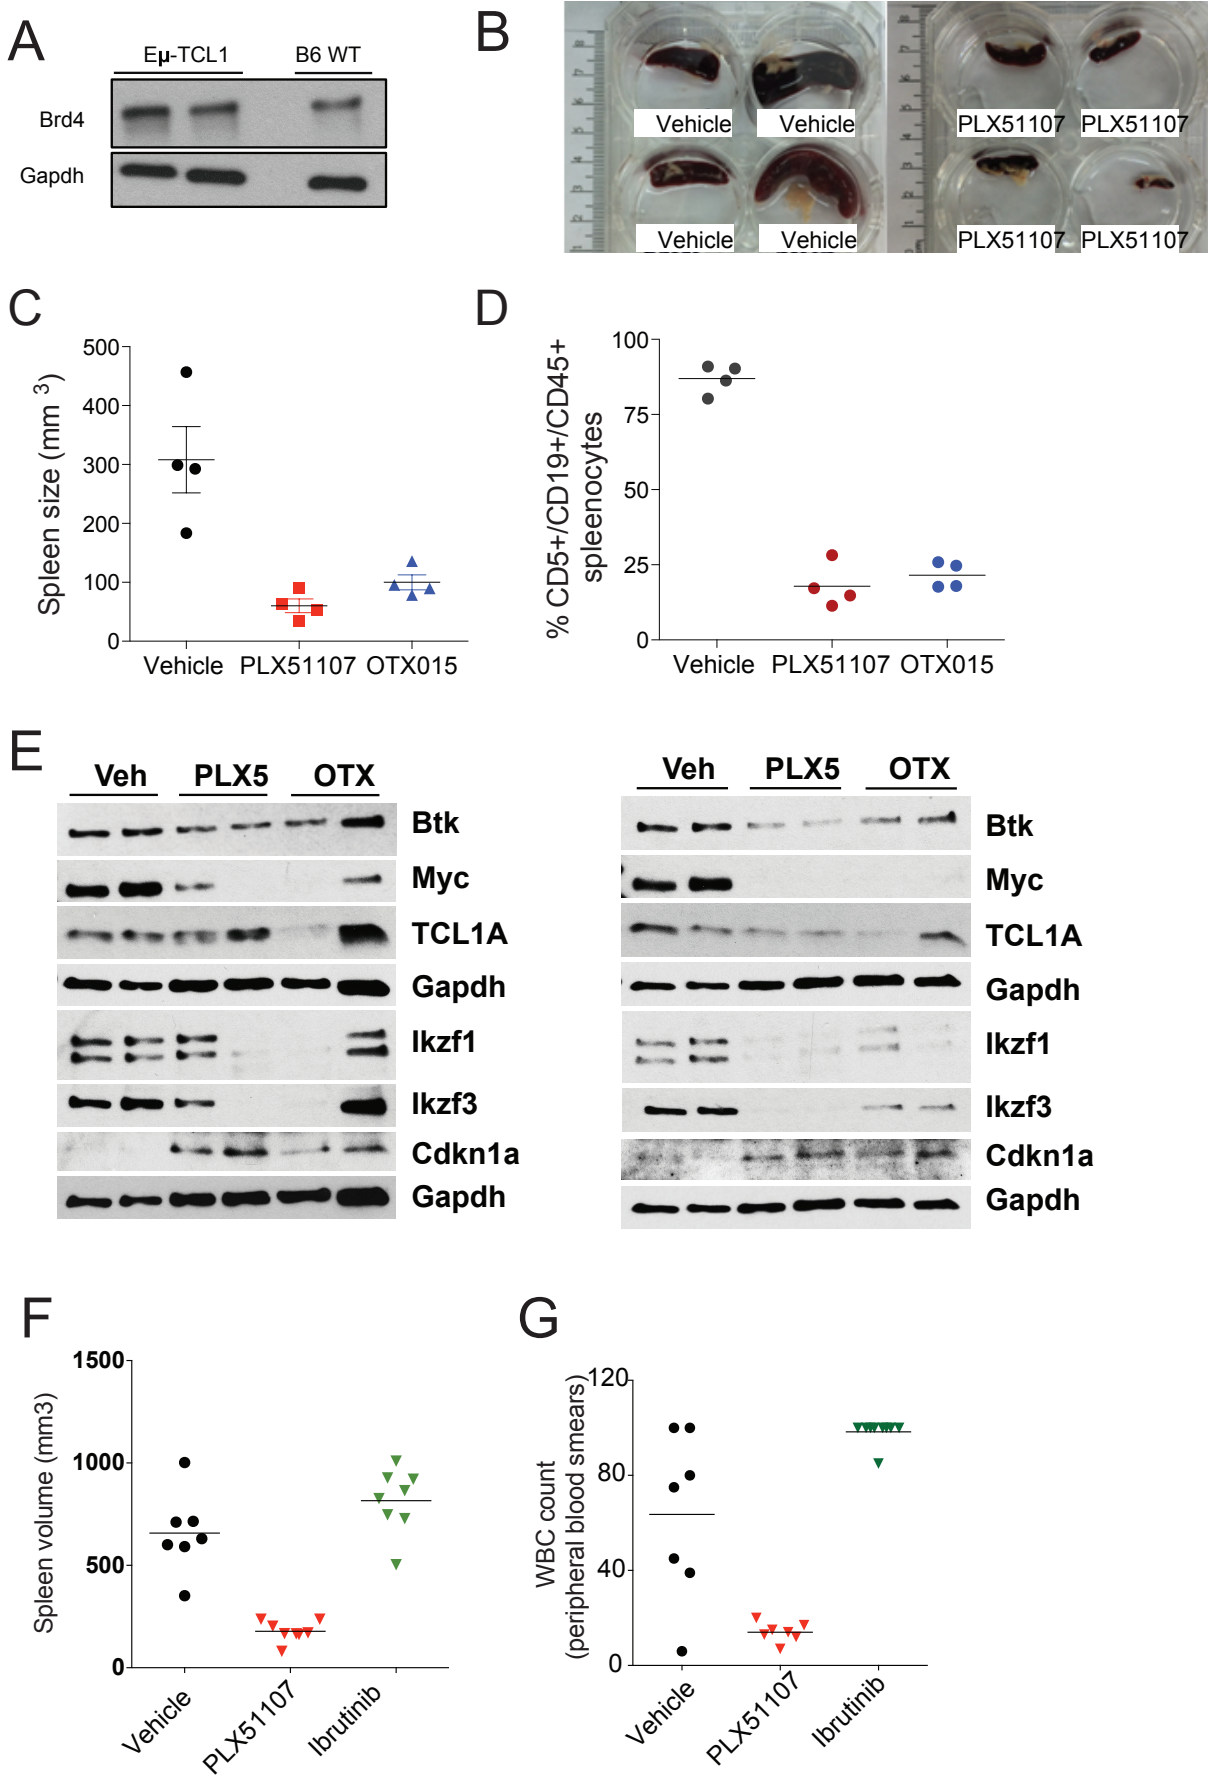

Figure S6

**Figure S6: Targeting BRD4 in transgenic mouse models of B-cell malignancies. A.** Immunoblot analysis of BRD4 expression in CD19 positive B-cells isolated from spleens of leukemic E $\mu$ -TCL1A mice and C56BL/6 wild type mouse (WT, 12 mo); GAPDH is used as loading control. **B.** Splenocytes derived from E $\mu$ -TCL1A mice were cultured in vitro with or without increasing concentration of PLX51107 for 48h. Effects on proliferation were determined by MTS assay and represented as % of vehicle control. Results shown as mean  $\pm$  SD of n=3 independent experiments; **C.** Splenocytes derived from E $\mu$ -TCL1A mice were cultured in vitro with or without increasing concentration of PLX51107 for 8h. *TCL1* mRNA transcript derived from the E $\mu$ -TCL1 transgene, *Hexim1* and *Myc* were assessed using qRT-PCR. Endogenous *Tcl1* expression (not shown) was also measured and was undetermined as previously described in this model; **D.** Decreased spleen size of PLX51107-treated E $\mu$ -TCL1 mice vs. vehicle control following an 8 day treatment (PLX51107: 20 mg/kg, qd, oral gavage); **E.** Caliper-derived spleen volumes of mice treated with PLX51107 (20 mg/kg, qd, oral gavage), OTX015 (50 mg/kg, qd, oral gavage) or vehicle control for 30 days. Spleen volumes were measured at time of death using a manual caliper (with 1mm error). Splenic volume was then calculated using the standard clinical ellipsoid equation of length  $\times$  width  $\times$  thickness  $\times$  0.523; **F.** Flow cytometry analysis of CD19/CD5/CD45 positive peripheral blood cells of mice treated for 30 days with PLX51107, OTX15 or vehicle control BL; **G.** Representative immunoblot analysis of relative protein levels of Btk, Myc, TCL1A, Ikaros1, Ikaros3, and Cdkn1a in splenocytes derived from mice treated with PLX51107, OTX15 or vehicle control for 30 days; **H-I.** Using an adoptive transfer model of E $\mu$ -TCL1, recipient wild type mice were randomized to receive vehicle Ibrutinib or PLX51107 (20 mg/kg, qd, oral gavage) at leukemia onset. Disease progression was measured by flow cytometry as % CD19/CD5/CD45 positive PBL: PLX51107 reduced spleen mass (F), and decreased % of circulating leukemic PBL as measured at time of death (G).



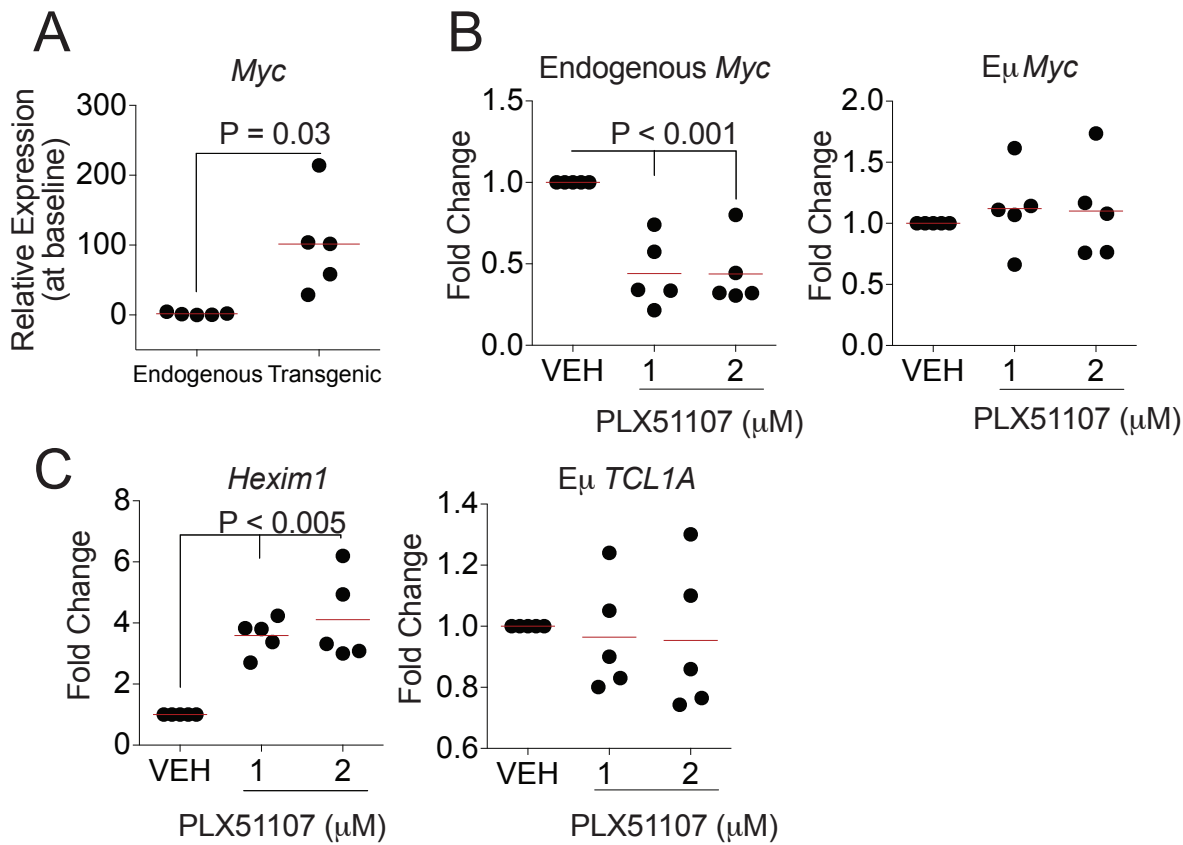

Figure S7

**Figure S7: BRD4 target modulation in a disease model of aggressive CLL and Richter's Transformation:** A-C) Splenocytes derived from *E $\mu$ -Myc/TCL1* mice were cultured in vitro. *Myc* mRNA transcript derived from the *E $\mu$ -Myc* transgene or the endogenous *Myc* locus was assessed using qRT-PCR at baseline (A) or following 8h exposure to either DMSO (vehicle) or PLX51107 (B) Transcript levels of *Hexim1* and *E $\mu$ -TCL1* transgene following 8h exposure to either DMSO (vehicle) or PLX51107.

**SUPPLEMENTARY TABLES**

**Table S1. Characteristic of patients used for the in vitro studies.**

| Fig. 1A | IgVH mutation al status (%) | Karyotype                                                                                                                                                                                                                                       | Cytogenetics |      |     |     | Treatment Status |
|---------|-----------------------------|-------------------------------------------------------------------------------------------------------------------------------------------------------------------------------------------------------------------------------------------------|--------------|------|-----|-----|------------------|
|         |                             |                                                                                                                                                                                                                                                 | 17p          | 11q  | 13q | 12q |                  |
| 250672  | U (0)                       | 49,XY,+X,add(1)(q21),dic(1;17)(p12;p11.2),t(2;14)(p13;q32.3),+4,add(4)(p12)x2,+6,add(6)(p21),psu<br>dic(8;6)(q24;q12),der(9)t(1;9)(p22;p13),+11,+12,t(19;22)(q13.3;q11.2)[cp25]/50,sl,+15[5].ish<br>add(6)(D6Z1+,SEC63+),dic(8;6)(D6Z1+,SEC63-) | pos          | pos  | neg | pos | T                |
| 251161  | M (10)                      | 46,XX,t(7;8)(p15;q24.1),del(13)(q12q14)[9]/47,XX,+X[2]/46,XX[7]/nonclonal[1]                                                                                                                                                                    | neg          | neg  | pos | neg | T                |
| 251806  | U (0)                       | 46,XX,del(11)(q21q23)[3]/46,XX[16]/nonclonal[1]                                                                                                                                                                                                 | neg          | pos  | pos | neg | T                |
| 251868  | U (0)                       | 43-46,XX,del(11)(q14q23),del(13)(q12q14)[cp2]/46,XX[12]/nonclonal[1]                                                                                                                                                                            | neg          | post | pos | neg | T                |
| 250782  | U (2.2)                     | 46,XX,add(10)(q24),add(19)(p13.3)[cp3]/45,sl,-X[cp8]/46,X,del(X)(q22)[cp2]/46,XX,del(13)(q22q34)[cp2]/46,XX[2]/nonclonal[3]                                                                                                                     | pos          | neg  | pos | neg | T                |
| 250547  | M (8.9)                     | 46,XX(19)/nonclonal(1)                                                                                                                                                                                                                          | pos          | neg  | pos | neg | Unt              |

| Fig. S1A | IgVH mutation al status (%) | Karyotype                                                                                                                                                                                                                                              | Cytogenetics |     |     |     | Treatment Status |
|----------|-----------------------------|--------------------------------------------------------------------------------------------------------------------------------------------------------------------------------------------------------------------------------------------------------|--------------|-----|-----|-----|------------------|
|          |                             |                                                                                                                                                                                                                                                        | 17p          | 11q | 13q | 12q |                  |
| 250751   | M (*)                       | 46,XX[19]/nonclonal[1]                                                                                                                                                                                                                                 | neg          | neg | pos | neg | T                |
| 251600   | U (0)                       | 46,XY[20]                                                                                                                                                                                                                                              | neg          | pos | pos | neg | T                |
| 251308   | M (7.8)                     | 46,XY[20]                                                                                                                                                                                                                                              | neg          | neg | pos | neg | Unt              |
| 250872   | M (4.1)                     | 46,XX[20]                                                                                                                                                                                                                                              | neg          | neg | pos | neg | Unt              |
| 250622   | M (4.4)                     | 46,XX[19]/nonclonal[1]                                                                                                                                                                                                                                 |              |     |     |     | Unt              |
| 250789   | U (0)                       | 48,XX,dup(1)(q12q32),inv(7)(p13q22),t(14;19)(q32;q13.3),+15,+21[17]/nonclonal with clonal abnormalities[3].ish<br>t(14;19)(3 (sq) IGH+;3 (sq) IGH+,5 (sq) IGH+)                                                                                        | neg          | neg | neg | neg | T                |
| 250749   | U (0)                       | 44,XY,add(3)(p26),der(11)t(11;15)(q21;q13),del(12)(q22),-15,dic(17;18)(p11.2;p11.2)[cp10]/46,XY[9]/nonclonal[1]Previously described as:<br>44,XY,add(3)(p26),der(11)t(11;15)(q21;q13),del(12)(q22),-15,der(17;18)(q10;q10)[cp10]/46,XY[9]/nonclonal[1] | pos          | pos | pos | neg | T                |
| 250967   | U (*)                       | 38-41,XX,ider(2)(p10)add(2)(p23),add(3)(p21),-4[8],del(4)(q13)[5],add(7)(q36),-8,-9,der(11)add(11)(p15)add(11)(q21),-13,-                                                                                                                              | pot          | pos | pos | neg | T                |

|  |  |                                                                                                         |  |  |  |  |  |
|--|--|---------------------------------------------------------------------------------------------------------|--|--|--|--|--|
|  |  | 13,-14,-15,-<br>17,der(19)t(13;19)(q14;p13.3),-21,-22,-<br>22,+mar1-12,inc[cp19, one is<br>4n]/46,XX[1] |  |  |  |  |  |
|--|--|---------------------------------------------------------------------------------------------------------|--|--|--|--|--|

| Fig. S4A | IgVH<br>mutational<br>status | Karyotype                                                                                                                                                                           | Cytogenetics |     |     |     | Treatment<br>Status* |
|----------|------------------------------|-------------------------------------------------------------------------------------------------------------------------------------------------------------------------------------|--------------|-----|-----|-----|----------------------|
|          |                              |                                                                                                                                                                                     | 17p          | 11q | 13q | 12q |                      |
| 250486   | M (5)                        | 46,XX,der(13)t(13;17)(q14;q11.2)ins(13;?)<br>(q14;?),der(17t(13;17)(q14;q11.2)[20]                                                                                                  | neg          | neg | neg | neg | T                    |
| 250510   | M (11.53)                    | 46,XY[20]                                                                                                                                                                           | neg          | neg | pos | neg | Unt                  |
| 251186   | U (0.3)                      | 46,XY,t(1;3)(p34;q12)[2]/46,XY[18]                                                                                                                                                  | neg          | neg | pos | neg | Unt                  |
| 251847   | U (1.4)                      | 48,XY,+7,add(7)(q22),+12[20]                                                                                                                                                        | neg          | neg | neg | pos | Unt                  |
| 251900   | U (0)                        | 45,XX,dic(4;18)(p12;p11.3),del(11)(q13.3q23.3)[cp2]/45,sl,add(12)(q24.3)[9]/45,<br>sdl1,add(15)(q26)[2]/45,sdl2,+12,-<br>add(12)[5]/45,sdl3,add(5)(q35)[cp2]                        | neg          | pos | pos | neg | Unt                  |
| 250236   | U (0)                        | 46,XY,dic(11;17)(p11.2;p11.2),+mar1[4]/<br>46,sl,-<br>dic(11;17),+11[cp3]/46,XY[10]/nonclonal[3]                                                                                    | pos          | neg | pos | neg | T                    |
| 250547   | U (*)_                       | 46,XX[19]/nonclonal[1]                                                                                                                                                              | pos          | neg | pos | neg | Unt                  |
| 250720   | M (7.14)                     | 46,XY,t(13;17)(q14;p13)[cp6,one is<br>4n]/46,sl,add(9)(q34)[cp3]/46,XY,der(17)<br>t(2;17)(p11.2;p11.2)[cp5]/45,XY,t(3;4)(<br>q21;q35),del(11)(q21),-<br>17[3]/46,XY[1]/nonclonal[2] | pos          | pos | neg | neg | Unt                  |
| 251608   | M (5.1)                      | 46,X,t(X;8)(q28;q22),del(6)(q15q21),inv(11)<br>(p15q23)[6]/nonclonal w/clonal<br>abnormalities[2]/46,XX[11]/nonclonal[1]                                                            | neg          | neg | pos | neg | T                    |
| 252097   | M (6.1)                      | 45,X,-Y,del(21)(q21.1q22)[17]/nonclonal<br>w/clonal abnormalities[2]/46,XY[1]                                                                                                       | neg          | neg | pos | neg | Unt                  |

| Fig 4G and<br>S3D | IgVH<br>mutational<br>status | Karyotype                                                                                                                                                                                             | Cytogenetics |     |     |     | Treatment<br>Status* |
|-------------------|------------------------------|-------------------------------------------------------------------------------------------------------------------------------------------------------------------------------------------------------|--------------|-----|-----|-----|----------------------|
|                   |                              |                                                                                                                                                                                                       | 17p          | 11q | 13q | 12q |                      |
| 251032            | U (0.3)                      | 45,XX,dic(4;17)(p11;p11.2)[12]/46,XX,t(13;16)<br>(q14;q24)[2]/46,XX[6]                                                                                                                                | pos          | neg | pos | neg | T                    |
| 251201            | U (0)                        | 46,XY,add(11)(q22)[6]/46,XY[13]/4n[1]                                                                                                                                                                 | neg          | pos | neg | neg | Unt                  |
| 251495            | M (8)                        | 46,XX[20]                                                                                                                                                                                             | neg          | neg | pos | neg | Unt                  |
| 251725            | U (0)                        | 46,XY[20]                                                                                                                                                                                             | neg          | neg | neg | neg | Unt                  |
| 252026            | M (3)                        | 44-76,XY,-<br>15,der(17)t(15;17)(q12;p12)[cp5,one is<br>4n]/40-45,XY,der(3)t(2;3)(p13;p21),-<br>6,add(17)(p13)[cp5]/46,XY[4]nonclonal[1].<br>ish der(3)t(2;3)(REL+),nuc<br>ish(D4Z1x2,D6Z1x1)[40/210] | pos          | pos | pos | neg | Unt                  |
| 251045            | U (*)_                       | 46,XY[19]/nonclonal[1]                                                                                                                                                                                | neg          | neg | pos | neg | T                    |
| 251180            | M (4.8)                      | 46,XY[19]/nonclonal[1]                                                                                                                                                                                | neg          | neg | pos | neg | Unt                  |
| 251749            | U (0)                        | Insufficient Metaphases<br>(46,XY[3]/nonclonal[1])                                                                                                                                                    | neg          | neg | pos | neg | T                    |
| 252502            | M (6.1)                      | 46,XX[18]/nonclonal[2]                                                                                                                                                                                | neg          | neg | pos | neg | Unt                  |
| 250810            | U (0)                        | 46,XX,del(10)(q23q25)[3]/45,X,-<br>X[cp4]/46,XX[13]                                                                                                                                                   | neg          | neg | neg | neg | T                    |

| ChIP-seq and ATAC-seq | IgVH mutation al status | Karyotype                                                                           | Cytogenetics |     |     |     | Treatment Status* |
|-----------------------|-------------------------|-------------------------------------------------------------------------------------|--------------|-----|-----|-----|-------------------|
|                       |                         |                                                                                     | 17p          | 11q | 13q | 12q |                   |
| 251177                | U (0)                   | 46,XY,del(11)(q14q23)[11]/nonclonal w/clonal abnormalities[6]/46,XY[2]/nonclonal[1] | neg          | pos | neg | neg | T                 |
| 252089                | U (0.8)                 | 47,XX,+12[20]                                                                       | neg          | neg | neg | pos | Unt               |
| 250808                | U (*)                   | 46,XX[20]                                                                           | neg          | neg | pos | neg | Unt               |
| 251025                | U (*)_                  | 46,XY[30]                                                                           | neg          | neg | pos | neg | Unt               |

| Fig 4G, S3C, and S4C | IgVH mutation al status | Karyotype                                               | Cytogenetics |     |     |     | Treatment Status* |
|----------------------|-------------------------|---------------------------------------------------------|--------------|-----|-----|-----|-------------------|
|                      |                         |                                                         | 17p          | 11q | 13q | 12q |                   |
| 252405               | U (0)                   | 45,XX,dic(17;18)(p11.2;p11.2)[5]/46,XX[15]/nonclonal[2] | pos          | neg | neg | neg | T                 |
| 252099               | M (11.1)                | 46,XX,del(13)(q12q14)[4]/46,XX[15]/nonclonal[1]         | neg          | neg | pos | neg | Unt               |
| 251692               | U (*)_                  | 46,XY[20]                                               | neg          | neg | pos | neg | T                 |
| 252436               | U (0)                   | 46,XX[21]                                               | neg          | pos | neg | neg | Unt               |
| 252108               | M (4.7)                 | 45,X,-X[10]/45,sl,t(10;13)(q22;q14)[2]/46,XX[8]         | neg          | neg | pos | neg | Unt               |

| Fig 3C | IgVH mutation al status | Karyotype                                                                                                                            | Cytogenetics |     |     |     | Treatment Status* |
|--------|-------------------------|--------------------------------------------------------------------------------------------------------------------------------------|--------------|-----|-----|-----|-------------------|
|        |                         |                                                                                                                                      | 17p          | 11q | 13q | 12q |                   |
| 250468 | U (*)_                  | 45,X,-Y,t(11;14)(q13;q32.3)[18]/46,XY[2]                                                                                             | neg          | pos | neg | neg | Unt               |
| 251915 | U (1.4)                 | 46,XY,del(11)(q21q23)[16]/nonclonal w/del(11q)[1]/46,XY[2]/nonclonal[1]                                                              | neg          | pos | pos | neg | Unt               |
| 252087 | U (0)                   | 47,XX,+12[19]/46,XX[1]                                                                                                               | neg          | pos | pos | pos | Unt               |
| 250169 | U (*)_                  | 47,XY,+12[12]/nonclonal w/ clonal abnormalities[1]/46,XY[6]/nonclonal[1]                                                             | neg          | pos | pos | pos | T                 |
| 250236 | U (0)                   | 46,XY,dic(11;17)(p11.2;p11.2),+mar1[6]/43-45,sl,-dic(11;17),+11[cp2]/46,sdl,-mar1,+mar2[2]/46,XY[10]/nonclonal[8]                    | pos          | neg | pos | neg | T                 |
| 250529 | U (2.36)                | 46,XY[29]/nonclonal[1]                                                                                                               | neg          | neg | pos | pos | Unt               |
| 250955 | M (6)                   | 46,XY[20]                                                                                                                            | neg          | neg | pos | pos | Unt               |
| 251013 | U (0.7)                 | 47,XX,+12[10]/47,sl,del(6)(q13q25)[6]/nonclonal w/ clonal abnormalities[1]/46,XX[3]                                                  | neg          | neg | neg | pos | Unt               |
| 251383 | U (*)_                  | 47,XY,+12[1]/45-46,sl,dic(8;17)(p11.2;p11.2)[14]/nonclonal w/clonal abnormalities[1]/46,XY[4]                                        | pos          | neg | neg | pos | Unt               |
| 251606 | U (0.3)                 | 46,XX,i(17)(q10)[cp1]/45,sl,-9,-10,+mar1[cp1]/46,XX,-14,add(17)(p11.2),-18,-21,+r,+mar2,+mar3[cp18, one is 4n]/46,XX[7]/nonclonal[2] | pos          | neg | pos | neg | Unt               |
| 251725 | U (0)                   | 46,XY[20]                                                                                                                            | neg          | neg | neg | neg | Unt               |
| 251975 | M (4.8)                 | 47,XY,+12[3]/46,XY[17]                                                                                                               | neg          | neg | pos | pos | Unt               |
| 252099 | M (11.1)                | 46,XX,del(13)(q12q14)[4]/46,XX[15]/nonclonal[1]                                                                                      | neg          | neg | pos | neg | Unt               |

| Fig S3A, and | IgVH | Karyotype | Cytogenetics | Treatment |
|--------------|------|-----------|--------------|-----------|
|--------------|------|-----------|--------------|-----------|

| S3B    | mutational status |                                                                                                       | 17p | 11q | 13q | 12q | Status |
|--------|-------------------|-------------------------------------------------------------------------------------------------------|-----|-----|-----|-----|--------|
| 250262 | U (0.3)           | 46,XY[19]/nonclonal[1]                                                                                | neg | neg | pos | neg | T      |
| 250776 | U (0)             | 46,XY,del(11)(q21q23)[2]/46,XY,dic(8;12)(p11.2;p11.2),+12[cp2]/46,XY[15]/nonclonal[1]                 | neg | pos | pos | pos | T      |
| 251161 | M (10.9)          | 46,XX,t(7;8)(p15;q24.1),del(13)(q12q14)[12]                                                           | neg | neg | pos | neg | Unt    |
| 251606 | U (0.3)           | 46,XX,i(17)(q10)[2]/45,sl,-9,-10,+mar[12]/90,sdx2[3]/nonclonal w/clonal abnormalities[1]/nonclonal[2] | pos | neg | pos | neg | Unt    |

| Fig 3A, and 3B | IgVH mutational status | Karyotype                                                                                                                                                                                                                                             | Cytogenetics |     |     |     | Treatment Status |
|----------------|------------------------|-------------------------------------------------------------------------------------------------------------------------------------------------------------------------------------------------------------------------------------------------------|--------------|-----|-----|-----|------------------|
|                |                        |                                                                                                                                                                                                                                                       | 17p          | 11q | 13q | 12q |                  |
| 251476         | U (1)                  | N/A                                                                                                                                                                                                                                                   | neg          | neg | pos | neg | Unt              |
| 251751         | U (1)                  | N/A                                                                                                                                                                                                                                                   | neg          | neg | pos | neg | Unt              |
| 252535         | U (*)                  | 47,XY,+2,del(2)(q31q35),del(11)(q13q23)[2,one w/nonclonal abnormalities]/46,sl,-del(2),add(2)(p23),del(13)(q12q14)[5,two w/nonclonal abnormalities]/46,XY[12]/nonclonal[1]                                                                            | neg          | pos | pos | neg | Unt              |
| 252053         | U (*)                  | 46,XY,del(13)(q12q14)[10]/46,sl,del(11)(q21q23)[3]/46,sdl1,t(5;19)(q11.2;q12)[2]/46,sl,add(17)(q25)[2]/46,XY[3]Previously reported as:46,XY,del(13)(q12q14)[10]/46,sl,del(11)(q13q23)[3]/46,sdl1,t(5;19)(q11.2;q12)[2]/46,sl,add(17)(q25)[2]/46,XY[3] | neg          | pos | pos | neg | Unt              |
| 251843         | U (0.3)                | 46,XX,t(9;13)(q33;q12)[2]/46,sl,der(11)inv(11)(p15q13)del(11)(q22q23)[5]/46,XX,del(13)(q14.1q14.3)[3]/46,XX[10]                                                                                                                                       | neg          | pos | pos | neg | T                |

Test for IgVH mutational status was performed but no % was documented; U (unmutated IgVH mutational status); M (mutated IgVH mutational status); pos (positive); neg (negative); T (treated patient); Unt (Untreated patient); NA (information not available).

**Table S2.** Top functional annotations of 764 genes common to super-enhancers (SEs) of at least three out of four samples by DAVID Functional Annotation Tool.

| Annotation Term                          | Genes                                                                                                                                                                                                                           | p-value  | FDR      |
|------------------------------------------|---------------------------------------------------------------------------------------------------------------------------------------------------------------------------------------------------------------------------------|----------|----------|
| <b>GO Biological Process Enrichment</b>  |                                                                                                                                                                                                                                 |          |          |
| B cell receptor signaling pathway        | IGHG2, PTPN6, IGLC7, BLK, IGLC6, TRDC, IGHM, IGHD, BCL2, IGHE, IGHA1, IGHA2, IGKC                                                                                                                                               | 4.01E-10 | 6.78E-07 |
| Positive regulation of B cell activation | IGHG2, IGLC7, IGHD, IGHE, IGLC6, IGHA1, IGHA2, TRDC, IGKC, IGHM                                                                                                                                                                 | 8.43E-10 | 1.42E-06 |
| Phagocytosis, recognition                | IGHG2, IGLC7, IGHD, IGHE, IGLC6, IGHA1, IGHA2, TRDC, IGKC, IGHM                                                                                                                                                                 | 1.80E-09 | 3.04E-06 |
| Immune response                          | TNF, IL19, TNFRSF8, TNFSF13, TNFSF12, HLA-DMA, TNFRSF4, IL10, CHIT1, B2M, TNFRSF1B, CXCR5, IL4R, TNFRSF18, IGHA1, NRROS, IGHA2, IGKC, LTB, LTA, CIITA, IL2RA, IL24, HLA-DQA1, SERPINB9, CCR7, IGHD, IRF8, IGHE, TNFSF12-TNFSF13 | 4.04E-09 | 6.82E-06 |
| Phagocytosis,                            | IGHG2, IGLC7, IGHD, IGHE, IGLC6,                                                                                                                                                                                                | 1.63E-   | 2.76E-05 |

|                                                                         |                                                                                                                                                                                                                                    |          |          |
|-------------------------------------------------------------------------|------------------------------------------------------------------------------------------------------------------------------------------------------------------------------------------------------------------------------------|----------|----------|
| engulfment                                                              | IGHA1, IGHA2, TRDC, IGKC, IGHM                                                                                                                                                                                                     | 08       |          |
| Negative regulation of transcription from RNA polymerase II promoter    | TNF, USP3, SPI1, PAX5, CBX7, NR1H2, HEXIM2, ATN1, HEXIM1, BCL11A, SOX15, BCL6, SUPT4H1, TCF4, ETV6, BCOR, CIITA, ZFP36, ZBTB20, IKZF1, ARID5B, KLF16, SPEN, TMPRSS6, JUNB, FOXP1, PLK3, BTG2, IRF8, JAZF1, TGIF1, PAF1, ZFPM1, ID3 | 4.75E-06 | 0.00803  |
| Negative regulation of transposition                                    | APOBEC3G, APOBEC3H, APOBEC3F, APOBEC3C, APOBEC3D                                                                                                                                                                                   | 9.29E-06 | 0.0157   |
| <b>GO Molecular Function Enrichment</b>                                 |                                                                                                                                                                                                                                    |          |          |
| Immunoglobulin receptor binding                                         | IGHG2, IGLC7, IGHD, IGHE, IGLC6, IGHA1, IGHA2, TRDC, IGKC, IGHM                                                                                                                                                                    | 9.44E-10 | 1.37E-06 |
| Protein binding                                                         | 212 Genes                                                                                                                                                                                                                          | 1.66E-05 | 0.0241   |
| Tumor necrosis factor receptor binding                                  | TRAF1, TNF, TNFSF13, TNFSF12, LTB, LTA, TRAF4                                                                                                                                                                                      | 1.82E-05 | 0.02643  |
| Antigen binding                                                         | IGHG2, IGLC7, IGHD, IGHE, IGLC6, IGHA1, IGHA2, FCGRT, TRDC, IGKC, IGHM                                                                                                                                                             | 3.63E-05 | 0.05255  |
| Hydrolase activity, acting on carbon-nitrogen bonds, in cyclic amidines | APOBEC3G, APOBEC3H, APOBEC3F, APOBEC3C, APOBEC3D                                                                                                                                                                                   | 4.40E-05 | 0.06374  |
| <b>GO Cellular Component Enrichment</b>                                 |                                                                                                                                                                                                                                    |          |          |
| External side of plasma membrane                                        | IGHG2, IL2RB, TNF, IL2RA, IGLC7, IGLC6, TNFRSF13C, TRDC, IGHM, PDCD1, B2M, CD83, CCR7, ECE1, CXCR5, IGHD, IGHE, IGHA1, IGHA2, IGKC                                                                                                 | 2.75E-08 | 3.72E-05 |
| Immunoglobulin complex, circulating                                     | IGHG2, IGLC7, IGHD, IGHE, IGLC6, TRDC, IGKC                                                                                                                                                                                        | 1.00E-06 | 0.00136  |
| Cytoplasmic mRNA processing body                                        | ZFP36, ZFP36L1, PATL2, APOBEC3G, LSM2, APOBEC3H, APOBEC3F, ZC3H12D, APOBEC3D, SAMD4B, DDX6                                                                                                                                         | 2.20E-06 | 0.00297  |
| Blood microparticle                                                     | IGHG2, IGLC7, IGLC6, HSPA1A, HSPA1B, TRDC, IGHM, HSPA1L, PFN1, IGHD, IGHE, IGHA1, IGHA2, IGKC                                                                                                                                      | 7.01E-06 | 0.00949  |
| <b>KEGG Pathway Enrichment</b>                                          |                                                                                                                                                                                                                                    |          |          |
| Cytokine-cytokine receptor interaction                                  | IL2RB, TNF, IL2RA, IL21R, TNFRSF13C, TNFRSF8, TNFSF13, TNFSF12, TNFRSF4, IL10, FLT3LG, TNFRSF1B, CCR7, CXCR5, CXCR4, IL10RA, IL4R, TNFRSF18, LTB, LTA                                                                              | 1.66E-06 | 0.00207  |

**Table S3: Crystallography data collection and refinement statistics**

|                        | BRD4-PLX5981<br>(PDB: 5WMA)                           | BRD4 <sup>D96A</sup> -PLX51107<br>(PDB: 5WVG)         | BRD4 <sup>D96A</sup> -OTX015<br>(PDB: 5WMD)           |
|------------------------|-------------------------------------------------------|-------------------------------------------------------|-------------------------------------------------------|
| <b>Data collection</b> |                                                       |                                                       |                                                       |
| Space group            | <i>P</i> 2 <sub>1</sub> 2 <sub>1</sub> 2 <sub>1</sub> | <i>P</i> 2 <sub>1</sub> 2 <sub>1</sub> 2 <sub>1</sub> | <i>P</i> 2 <sub>1</sub> 2 <sub>1</sub> 2 <sub>1</sub> |

|                                                      |                  |                  |                  |
|------------------------------------------------------|------------------|------------------|------------------|
| Cell dimensions                                      |                  |                  |                  |
| <i>a, b, c</i> (Å)                                   | 39.2, 44.5, 78.3 | 38.8, 42.2, 92.4 | 36.9, 44.6, 77.8 |
| Resolution (Å) <sup>a</sup>                          | 78.6-1.40        | 24.9-1.15        | 21.2-1.18        |
|                                                      | (1.45-1.40)      | (1.19-1.15)      | (1.22-1.18)      |
| <i>R</i> <sub>sym</sub> or <i>R</i> <sub>merge</sub> | 0.111 (0.558)    | 0.04 (0.486)     | 0.037 (0.239)    |
| <i>  σ </i>                                          | 9.8 (3.3)        | 20.8 (2.5)       | 25.5 (6.7)       |
| Completeness (%)                                     | 99.9 (100.0)     | 94.3 (70.3)      | 93.6 (79.8)      |
| Redundancy                                           | 5.6 (5.6)        | 5.7 (4.0)        | 5.9 (5.5)        |
| <b>Refinement</b>                                    |                  |                  |                  |
| Resolution (Å)                                       | 38.7-1.40        | 24.1-1.19        | 21.2-1.27        |
| No. reflections                                      | 26,187           | 48,029           | 33,012           |
| <i>R</i> <sub>work</sub> / <i>R</i> <sub>free</sub>  | 0.146/0.176      | 0.130/0.146      | 0.145/0.170      |
| R.m.s deviations                                     |                  |                  |                  |
| Bond lengths (Å)                                     | 0.004            | 0.004            | 0.012            |
| Bond angles (°)                                      | 1.0              | 1.0              | 1.5              |
| Most favored region (%) <sup>b</sup>                 | 99.2             | 98.3             | 96.7             |
| Additional allowed region                            | 0.8              | 1.7              | 3.3              |
| Disallowed region (%) <sup>b</sup>                   | 0.0              | 0.0              | 0.0              |

<sup>a</sup>Highest resolution shell is shown in parenthesis.

<sup>b</sup>In the Ramachandran plot

**Table S4: Single concentration binding assays and *K*<sub>d</sub> measurements for PLX51107 against 32 bromodomains.**

| Domain <sup>a</sup> | Bromodomain Protein Name                                                                          | %Inhibition at 1 μM | <i>K</i> <sub>d</sub> (nM) |
|---------------------|---------------------------------------------------------------------------------------------------|---------------------|----------------------------|
| BRD2(1)             | bromodomain-containing protein 2, bromodomain 1                                                   | 100                 | 1.6                        |
| BRD2(2)             | bromodomain-containing protein 2, bromodomain 2                                                   | 100                 | 5.9                        |
| BRD3(1)             | bromodomain-containing protein 3, bromodomain 1                                                   | 100                 | 2.1                        |
| BRD3(2)             | bromodomain-containing protein 3, bromodomain 2                                                   | 100                 | 6.2                        |
| BRD4(1)             | bromodomain-containing protein 4, bromodomain 1                                                   | 100                 | 1.7                        |
| BRD4(2)             | bromodomain-containing protein 4, bromodomain 2                                                   | 100                 | 6.1                        |
| BRDT(1)             | bromodomain testis-specific protein, bromodomain 1                                                | 90                  | 5.0                        |
| BRDT(2)             | bromodomain testis-specific protein, bromodomain 2                                                | 97                  | 120                        |
| CREBBP              | CREB binding protein                                                                              | 100                 | 110                        |
| EP300               | E1A binding protein p300                                                                          | 100                 | 130                        |
| TAF1(2)             | TATA box binding protein (TBP)-associated factor 1, bromodomain 2                                 | 48                  | 2,200                      |
| SMARCA4             | SWI/SNF related, matrix associated, actin dependent regulator of chromatin, subfamily a, member 4 | 60                  | >10,000                    |
| CECR2               | cat eye syndrome chromosome region, candidate 2                                                   | 37                  | NA                         |

| Domain <sup>a</sup> | Bromodomain Protein Name                                                                          | %Inhibition at 1 $\mu$ M | K <sub>d</sub> (nM) |
|---------------------|---------------------------------------------------------------------------------------------------|--------------------------|---------------------|
| WDR9(2)             | bromodomain and WD repeat domain containing 1, bromodomain 2                                      | 36                       | NA                  |
| GCN5L2              | GCN5 like 2 or K(lysine) acetyltransferase 2A (KAT2A)                                             | 30                       | NA                  |
| BAZ2A               | bromodomain adjacent to zinc finger domain, 2A                                                    | 29                       | NA                  |
| BRD9                | bromodomain-containing protein 9                                                                  | 28                       | NA                  |
| PBRM1(5)            | polybromo 1, bromodomain 5                                                                        | 25                       | NA                  |
| TRIM24              | tripartite motif containing 24 (PHD+bromodomain)                                                  | 23                       | NA                  |
| BAZ2B               | bromodomain adjacent to zinc finger domain, 2B                                                    | 23                       | NA                  |
| TRIM33              | tripartite motif containing 33 (PHD+bromodomain)                                                  | 15                       | NA                  |
| SMARCA2             | SWI/SNF related, matrix associated, actin dependent regulator of chromatin, subfamily a, member 2 | 11                       | NA                  |
| BRPF3               | bromodomain and PHD finger containing, 3                                                          | 10                       | NA                  |
| BRD7                | bromodomain containing 7                                                                          | 10                       | NA                  |
| PCAF                | P300/CBP-associated factor or K(lysine) acetyltransferase 2B (KAT2B)                              | 6                        | NA                  |
| PBRM1(2)            | polybromo 1, bromodomain 2                                                                        | 0                        | NA                  |
| ATAD2A              | ATPase family AAA domain containing 2                                                             | 0                        | NA                  |
| ATAD2B              | ATPase family AAA domain containing 2B                                                            | 0                        | NA                  |
| BRD1                | bromodomain-containing protein 1                                                                  | 0                        | NA                  |
| BRPF1               | bromodomain and PHD finger containing, 1                                                          | 0                        | NA                  |
| BPTF                | bromodomain PHD finger transcription factor, also known as FALZ                                   | 0                        | NA                  |
| TAF1L(2)            | TATA box binding protein (TBP)-associated factor 1L, bromodomain 2                                | 0                        | NA                  |

<sup>a</sup> Each assay used a truncated protein that includes a single bromodomain (value in parentheses indicates which bromodomain is used when the full length protein contains two bromodomains; 1 stands for BD1 and 2 stands for BD2). <sup>b</sup> Single concentration (at 1  $\mu$ M) primary screening data for all 32 bromodomains are presented as percentage of inhibition. <sup>c</sup> K<sub>d</sub> values for 12 bromodomains that exhibited >50% inhibition in the primary screen. Assays that showed <50% inhibition at 1  $\mu$ M were not pursued for K<sub>d</sub> determination (NA)

**Table S5:** Profiling PLX51107 in Genscript Leukemia and Lymphoma panel reveals broad activity in various malignant cell lines.

| Cell Line | Histologic Type                         | IC <sub>50</sub> ( $\mu$ M) | 95% CI ( $\mu$ M) |
|-----------|-----------------------------------------|-----------------------------|-------------------|
| CCRF-CEM  | Leukemia, acute lymphoblastic           | 0.020                       | 0.015 - 0.027     |
| RPMI 8226 | Myeloma, plasmacytoma                   | 0.020                       | 0.015 - 0.027     |
| MV4-11    | Leukemia, biphenotypic B myelomonocytic | 0.031                       | 0.029 - 0.032     |
| 8E5       | Leukemia, acute lymphoblastic           | 0.051                       | 0.032 - 0.081     |
| SC        | Monocyte/Macrophage                     | 0.056                       | 0.036 - 0.088     |
| KE-37     | Leukemia, T cell                        | 0.067                       | 0.054 - 0.083     |
| HuT 78    | Lymphoma                                | 0.067                       | 0.050 - 0.090     |
| Loucy     | Leukemia, acute lymphoblastic t(16;20)  | 0.084                       | 0.067 - 0.11      |



| Cell Line     | Histologic Type                                     | IC <sub>50</sub><br>( $\mu$ M) | 95% CI ( $\mu$ M) |
|---------------|-----------------------------------------------------|--------------------------------|-------------------|
|               | translocation                                       |                                |                   |
| BDCM          | Leukemia, acute myelogenous                         | 0.084                          | 0.055 - 0.13      |
| RL            | Lymphoma, non-Hodgkin's                             | 0.091                          | 0.071 - 0.12      |
| J.RT3-T3.5    | Leukemia, acute T cell                              | 0.10                           | 0.081 - 0.13      |
| CA46          | Lymphoma, Burkitt's                                 | 0.11                           | 0.076 - 0.16      |
| BC-1          | Lymphoma, EBV and KSHV positive                     | 0.11                           | 0.068 - 0.19      |
| DOHH2         | Lymphoma                                            | 0.12                           | 0.096 - 0.14      |
| EOL-1         | Lymphoma                                            | 0.12                           | 0.092 - 0.16      |
| CEM/C2        | Leukemia, acute lymphoblastic                       | 0.14                           | 0.11 - 0.18       |
| K562          | Leukemia, myelogenous                               | 0.15                           | 0.10 - 0.23       |
| MOLT-4        | Leukemia, acute lymphoblastic                       | 0.16                           | 0.089 - 0.27      |
| P3HR-1        | Lymphoma, Burkitt's                                 | 0.16                           | 0.13 - 0.21       |
| Kasumi-1      | Leukemia, acute myeloblastic                        | 0.18                           | 0.14 - 0.23       |
| MPC-11        | Myeloma, Mouse                                      | 0.19                           | 0.14 - 0.26       |
| H9            | Lymphoma, cutaneous                                 | 0.22                           | 0.20 - 0.24       |
| Mo            | Leukemia, hairy cell                                | 0.23                           | 0.16 - 0.32       |
| CEM/C3        | Leukemia, acute lymphoblastic                       | 0.24                           | 0.18 - 0.31       |
| MJ            | Lymphoma, cutaneous T cell, mycosis fungoides       | 0.24                           | 0.18 - 0.32       |
| JVM-2         | Leukemia                                            | 0.24                           | 0.15 - 0.40       |
| HH            | Lymphoma, cutaneous T cell                          | 0.25                           | 0.15 - 0.39       |
| TF-1          | Erythroleukemia                                     | 0.26                           | 0.16 - 0.43       |
| KU812         | Leukemia, chronic myelogenous                       | 0.27                           | 0.19 - 0.36       |
| AHH-1         | Lymphoblastoid                                      | 0.30                           | 0.22 - 0.41       |
| GDM-1         | Leukemia, myelomonoblastic                          | 0.34                           | 0.23 - 0.48       |
| MOLT-3        | Leukemia, acute lymphoblastic                       | 0.39                           | 0.21 - 0.73       |
| KG-1          | Leukemia, acute lymphoblastic                       | 0.39                           | 0.22 - 0.70       |
| RPMI 7666     | Lymphoblast                                         | 0.43                           | 0.25 - 0.74       |
| Daudi         | Lymphoma, Burkitt's                                 | 0.45                           | 0.37 - 0.54       |
| CESS          | Leukemia, myelomonocytic                            | 0.49                           | 0.29 - 0.84       |
| HL-60 clone15 | Leukemia, Acute promyelocytic                       | 0.49                           | 0.43 - 0.57       |
| GK-5          | B lymphoblast; Epstein-Barr virus (EBV) transformed | 0.53                           | 0.30 - 0.91       |
| ARH-77        | Leukemia, plasma cell                               | 0.57                           | 0.27 - 1.20       |

| Cell Line      | Histologic Type                                      | IC <sub>50</sub><br>( $\mu$ M) | 95% CI ( $\mu$ M) |
|----------------|------------------------------------------------------|--------------------------------|-------------------|
| CEM/C1         | Leukemia, acute lymphoblastic                        | 0.58                           | 0.39 - 0.84       |
| HL-60          | Leukemia, promyelocytic                              | 0.61                           | 0.54 - 0.68       |
| D1.1           | Leukemia, acute T cell, CD4 negative                 | 0.62                           | 0.25 - 1.52       |
| P116           | Leukemia, acute T cell                               | 0.62                           | 0.37 - 1.03       |
| SUP-B15        | Leukemia, acute lymphoblastic                        | 0.63                           | 0.38 - 1.04       |
| Jurkat         | Leukemia, acute T cell                               | 0.67                           | 0.42 - 1.08       |
| KU 812 E       | Leukemia, chronic myelogenous                        | 0.73                           | 0.63 - 0.84       |
| CCRF-HSB-2     | Leukemia, acute lymphoblastic                        | 0.82                           | 0.52 - 1.28       |
| WIL2-S         | B lymphoblast, hereditary spherocytosis, spleen      | 0.93                           | 0.63 - 1.39       |
| MC116          | Lymphoma, undifferentiated                           | 0.95                           | 0.48 - 1.88       |
| J45.01         | Leukemia, acute T cell, CD45 deficient               | 0.99                           | 0.70 - 1.40       |
| P116.cl39      | Leukemia, acute T cell                               | 1.88                           | 0.80 - 4.41       |
| Ramos.2G6.4C10 | Lymphoma, Burkitt's                                  | 1.91                           | 0.96 - 3.83       |
| RS4;11         | Leukemia, acute lymphoblastic, t(4;11) translocation | 2.13                           | 0.73 - 6.16       |
| CML-T1         | Leukemia, T-lymphocyte, chronic myelogenous          | ~2.5 <sup>a</sup>              | NA                |
| SU-DHL-6       | Lymphoblast-like, peritoneal effusion                | 2.86                           | 0.86 - 9.46       |
| I 9.2          | Leukemia, acute T cell                               | 2.88                           | 0.94 - 8.77       |
| TALL-1         | Lymphoma, T cell                                     | 3.30                           | 1.60 - 6.84       |
| SUP-T1         | Leukemia, lymphoblastic                              | 3.70                           | 1.60 - 8.56       |
| Raji           | Lymphoma, Burkitt's                                  | 4.00                           | 2.45 - 6.51       |
| ST486          | Lymphoma, Burkitt's                                  | 5.19                           | 3.00 - 8.99       |
| U266B1         | Myeloma; plasmacytoma                                | 6.59                           | 3.56 - 12.20      |
| U-937          | Lymphoma, histiocytic                                | 7.58                           | 5.42 - 10.62      |
| AML-193        | Leukemia, Acute monocytic                            | 8.21                           | 4.84 - 13.94      |
| Toledo         | Lymphoma, diffuse large cell, non-Hodgkin's B cell   | 12.06                          | 2.25 - 64.51      |
| NAMALWA        | Lymphoblastoid                                       | 13.57                          | 9.47 - 19.44      |
| EB-1           | Lymphoma, Burkitt's                                  | >20                            | NA                |
| EB-2           | Lymphoma, Burkitt's                                  | >20                            | NA                |
| GA-10          | Lymphoma, Burkitt's                                  | >20                            | NA                |
| NCI-H929       | Myeloma, plasmacytoma                                | >20                            | NA                |

<sup>a</sup> Estimated value from incomplete curve.

**Table S6A.** The top 20 canonical pathways identified by IPA for 1361 differentially expressed genes upon BRD4 inhibition in microarray data of CpG-stimulated B-CLL cells (fold change > 2 and  $p < 0.01$ ).

| Ingenuity Canonical Pathways                                         | p-value     | Molecules                                                                                                                                                                                                                                                            |
|----------------------------------------------------------------------|-------------|----------------------------------------------------------------------------------------------------------------------------------------------------------------------------------------------------------------------------------------------------------------------|
| B Cell Receptor Signaling                                            | 6.30957E-12 | MAP2K6, RAP2B, RAP2A, POU2F2, NFATC3, PIK3R1, SOS2, PDPK1, PTPRC, PAX5, IKBKB, PIK3CG, CD22, IRS2, RASSF5, GSK3B, MAP2K1, PPP3CA, MAP3K9, MAP3K14, NRAS, CSK, FGFR1, EGR1, MAPK8, IKBKE, MALT1, BCL2L1, CALM1, SYNJ1, FOXO1, SYK, VAV3, IGHG4, MEF2C, MAP2K3, MAP3K3 |
| CD28 Signaling in T Helper Cells                                     | 5.24807E-08 | FYN, NFATC3, CSK, FGFR1, PIK3R1, CHP1, MAPK8, PDPK1, IKBKE, HLA-DQB1, MALT1, ITPR1, CTLA4, PTPRC, IKBKB, CALM1, CD80, PIK3CG, SYK, HLA-DMB, HLA-DOB, CD86, IRS2, MAP2K1, PPP3CA                                                                                      |
| T Cell Receptor Signaling                                            | 1.34896E-07 | FYN, NRAS, NFATC3, CSK, FGFR1, PIK3R1, SOS2, MAPK8, IKBKE, MALT1, CTLA4, PTPRC, TEC, CALM1, IKBKB, TXK, VAV3, RASGRP1, PIK3CG, IRS2, MAP2K1, PPP3CA                                                                                                                  |
| PKCθ Signaling in T Lymphocytes                                      | 8.31764E-07 | FYN, MAP3K14, MAP3K9, NRAS, NFATC3, FGFR1, PIK3R1, SOS2, CHP1, MAPK8, IKBKE, MALT1, HLA-DQB1, IKBKB, CD80, VAV3, PIK3CG, HLA-DMB, CD86, HLA-DOB, IRS2, MAP3K3, PPP3CA                                                                                                |
| PI3K Signaling in B Lymphocytes                                      | 2.0893E-06  | CD81, FYN, NRAS, NFATC3, PIK3R1, CHP1, PDPK1, IKBKE, ITPR1, MALT1, PTPRC, BLK, CALM1, IKBKB, CD180, VAV3, PIK3CG, SYK, FOXO3, IRS2, MAP2K1, PPP3CA                                                                                                                   |
| Th1 and Th2 Activation Pathway                                       | 2.13796E-06 | MAP2K6, TNFSF4, ICAM1, NFATC3, CHD4, PIK3R1, HLA-DQB1, NFIL3, NOTCH2, TGFB1, PIK3CG, HLA-DMB, IRS2, STAT1, STAT6, IL10, mir-29, IKZF1, FGFR1, CD80, LTA, IL10RA, S1PR1, CD86, HLA-DOB, JAK3, NOTCH1                                                                  |
| CD27 Signaling in Lymphocytes                                        | 2.39883E-06 | MAP2K6, MAP3K14, MAP3K9, APAF1, MAPK8, IKBKE, IKBKB, BCL2L1, BID, MAP2K3, CD27, MAP2K1, MAP3K3                                                                                                                                                                       |
| Regulation of IL-2 Expression in Activated and Anergic T Lymphocytes | 4.89779E-06 | FYN, IKBKB, CALM1, NRAS, CD80, NFATC3, TGFB1, VAV3, CHP1, SOS2, MAPK8, TOB1, IKBKE, MALT1, MAP2K1, PPP3CA                                                                                                                                                            |
| Th1 Pathway                                                          | 1.07152E-05 | MAP2K6, ICAM1, IL10, mir-29, NFATC3, FGFR1, PIK3R1, HLA-DQB1, NFIL3, NOTCH2, CD80, LTA, PIK3CG, HLA-DMB, IL10RA, CD86, HLA-DOB, IRS2, STAT1, JAK3, NOTCH1                                                                                                            |
| CD40 Signaling                                                       | 1.34896E-05 | MAP2K6, MAP3K14, ICAM1, FGFR1, PIK3R1, MAPK8, IKBKE, IKBKB, LTA, PIK3CG, IRS2, MAP2K3, JAK3, MAP2K1, FCER2                                                                                                                                                           |
| Germ Cell-Sertoli Cell Junction Signaling                            | 2.23872E-05 | MAP2K6, TUBA1B, MAP3K14, MAP3K9, NRAS, TUBB4B, FGFR1, PIK3R1, TUBB2A, MAPK8, TUBA4A, PDPK1, TUBA1A, SORBS1, TGFB1, PIK3CG, MAP2K3, IRS2, MTMR2, ACTN4, VCL, MAP3K3, ACTG1, MAP2K1                                                                                    |
| Death Receptor Signaling                                             | 2.63027E-05 | MAP3K14, MAPK8, APAF1, ZC3HAV1, PARP8, IKBKE, PARP9, IKBKB, PARP15, TIPARP, BID, SPTAN1, CFLAR, MAP4K4, ACTG1, PARP14                                                                                                                                                |
| NRF2-mediated Oxidative Stress Response                              | 3.71535E-05 | MAP2K6, NRAS, FGFR1, NQO2, PIK3R1, MAPK8, DNAJC3, GCLC, DNAJC1, SOD1, CLPP, FTL, PIK3CG, VCP, CAT, IRS2, MAP2K3, JUND, DNAJB1, GSK3B, FKBP5, MAP2K1, ENC1, ACTG1, DNAJC7                                                                                             |
| Docosahexaenoic Acid (DHA) Signaling                                 | 4.57088E-05 | BCL2L1, FOXO1, PIK3CG, PIK3R1, FGFR1, APAF1, BID, PDPK1, IRS2, GSK3B, PNPLA2,                                                                                                                                                                                        |

|                                                             |             |                                                                                                                                                                                                                                               |
|-------------------------------------------------------------|-------------|-----------------------------------------------------------------------------------------------------------------------------------------------------------------------------------------------------------------------------------------------|
|                                                             |             | APP                                                                                                                                                                                                                                           |
| Granzyme A Signaling                                        | 5.01187E-05 | SET, ANP32A, HIST1H1C, NME1, HIST1H1E, H1FX, HMGB2                                                                                                                                                                                            |
| Altered T Cell and B Cell Signaling in Rheumatoid Arthritis | 7.76247E-05 | MAP3K14, SLAMF1, IL10, LTB, HLA-DQB1, TLR10, CD80, TGFB1, LTA, TLR1, HLA-DMB, TLR6, CD86, HLA-DOB, TNFRSF13B                                                                                                                                  |
| Role of NFAT in Regulation of the Immune Response           | 8.51138E-05 | FYN, NRAS, NFATC3, FGFR1, PIK3R1, SOS2, CHP1, IKBKE, ITPR1, HLA-DQB1, GNAI2, CALM1, IKBKB, CD80, SYK, PIK3CG, HLA-DMB, CD86, HLA-DOB, MEF2C, IRS2, GSK3B, MAP2K1, PPP3CA                                                                      |
| IL-4 Signaling                                              | 8.91251E-05 | STAT6, NRAS, IL13RA1, NFATC3, FGFR1, PIK3R1, SOS2, HLA-DQB1, SYNJ1, PIK3CG, HLA-DMB, HLA-DOB, IRS2, JAK3, FCER2                                                                                                                               |
| Glucocorticoid Receptor Signaling                           | 0.000102329 | ICAM1, POU2F2, NFATC3, PIK3R1, HSPA1A/HSPA1B, SOS2, GTF2A1, IKBKB, GTF2B, POLR2A, TGFB1, PIK3CG, FOXO3, IRS2, FKBP5, STAT1, MAP2K1, POLR2L, PPP3CA, MAP3K14, NRAS, IL10, FGFR1, CHP1, MAPK8, IKBKE, BCL2L1, TAF5, SMARCA2, PRKACA, JAK3, HLTF |
| UVA-Induced MAPK Signaling                                  | 0.000109648 | NRAS, FGFR1, PIK3R1, MAPK8, ZC3HAV1, PARP8, SMPD1, RPS6KA5, PARP9, BCL2L1, PARP15, TIPARP, PIK3CG, IRS2, STAT1, PARP14                                                                                                                        |

**Table S6B.** The top 20 upstream regulators predicted by IPA to be inhibited or activated for 1361 differentially expressed genes upon BRD4 inhibition in microarray data of CpG-stimulated B-CLL cells (fold change > 2 and  $p < 0.01$ ).

| Upstream Regulator | Molecule Type | Predicted Activation State | Activation z-score | p-value of overlap | Target molecules in dataset                                                                                                                                                                                                                                                                                                                                                                                                                                                                                                                                                                                                                                                                                                                                                    |
|--------------------|---------------|----------------------------|--------------------|--------------------|--------------------------------------------------------------------------------------------------------------------------------------------------------------------------------------------------------------------------------------------------------------------------------------------------------------------------------------------------------------------------------------------------------------------------------------------------------------------------------------------------------------------------------------------------------------------------------------------------------------------------------------------------------------------------------------------------------------------------------------------------------------------------------|
| IFNG               | cytokine      | Inhibited                  | -5.484             | 0.0000114          | ABCB1, ABCD3, ALOX5AP, APOL6, APP, ARL6IP5, ATP1A1, BCL2L1, BID, BST2, CASP4, CAT, CCL4, CD200, CD80, CD86, CERS6, CFLAR, CIRBP, CLEC2D, CSK, DDIAS, DTX3L, EGR1, EIF2AK2, ERAP2, ERCC8, FCER2, FKBP5, FOXO1, FTL, GART, GBP3, GBP4, GCH1, GLIPR2, GLS, GLUL, GNAI2, HDAC9, HERC6, HLA-DMB, HLA-DOB, HLA-DQB1, HSPA1A/HSPA1B, ICAM1, IER3, IFI16, IFI30, IFIH1, IFIT5, IFITM2, IKBKE, IL10, IL10RA, IRF2, IRF5, IRF7, IRS2, ISG20, ITGAL, ITPR1, JAK3, JUND, KARS, KLF2, KMO, KYNU, LAT2, LPL, LTA, LTB, MAN2A1, MAP2K1, MARCKSL1, MNDA, NCF2, NF1, NMI, NOD2, NOTCH1, OAS2, OAS3, OPN3, P2RY14, PARP9, PECAM1, PLEK, RAD18, RAP2B, RFX5, RTP4, SAMD9, SAMHD1, SELL, SELP, SLAMF1, SLC11A2, SLC12A2, SP110, STAT1, STAT6, TGFB1, TLR1, TLR6, TMEM50B, TRIM21, TXK, WARS, ZFP36 |

|       |                          |           |        |             |                                                                                                                                                                                                                                                                                                                                                                                                                                                                                                                                                                                                                                                                                                                                                                                                                                                                                                                                                                                                                                                                      |
|-------|--------------------------|-----------|--------|-------------|----------------------------------------------------------------------------------------------------------------------------------------------------------------------------------------------------------------------------------------------------------------------------------------------------------------------------------------------------------------------------------------------------------------------------------------------------------------------------------------------------------------------------------------------------------------------------------------------------------------------------------------------------------------------------------------------------------------------------------------------------------------------------------------------------------------------------------------------------------------------------------------------------------------------------------------------------------------------------------------------------------------------------------------------------------------------|
| IFNA2 | cytokine                 | Inhibited | -3.899 | 0.000000866 | APOL6, BST2, CCDC92, CD69, CD86, DDX60, EIF2AK2, FAM65B, GBP4, HERC6, HSH2D, IFI16, IFIH1, IFIT5, IFITM2, IL10, IRF5, IRF7, ISG20, LILRB2, LILRB4, MAP2K1, OAS2, OAS3, PARP9, SAMD9, SAMHD1, SP110, STAT1, TNFRSF10D, TRIM21, XAF1, ZC3HAV1                                                                                                                                                                                                                                                                                                                                                                                                                                                                                                                                                                                                                                                                                                                                                                                                                          |
| IFNL1 | cytokine                 | Inhibited | -3.628 | 0.00000059  | APOL6, BST2, CD80, DDX60, EIF2AK2, HERC6, IFIH1, IFIT5, IL10, ISG20, OAS2, OAS3, SAMD9, SP110, STAT1, TMEM140, ZC3HAV1                                                                                                                                                                                                                                                                                                                                                                                                                                                                                                                                                                                                                                                                                                                                                                                                                                                                                                                                               |
| IFNB1 | cytokine                 | Inhibited | -3.486 | 0.00697     | ANXA5, BCL2L1, BST2, BTN3A3, CCL4, CD80, CD86, EIF2AK2, GBP3, GBP4, HMGB2, IFI16, IFIH1, IL10, IRF7, ISG20, NMI, NOD2, NOTCH1, OAS2, RNASEL, STAT1, TNFSF4, TRIM21, VCL, XAF1                                                                                                                                                                                                                                                                                                                                                                                                                                                                                                                                                                                                                                                                                                                                                                                                                                                                                        |
| TNF   | cytokine                 | Inhibited | -3.412 | 0.00000104  | ABCD2, ACOX1, AIMP1, ALCAM, ALOX5AP, APAF1, APP, ARID5B, ARL6IP5, ARDC3, ATP1A1, ATP2B4, BCKDHB, BCL2L1, BID, BST2, BTN3A3, CALR, CASP4, CAT, CCL4, CD5, CD69, CD80, CD86, CERS6, CFLAR, CNR2, COTL1, CPT1A, CRY1, CTLA4, DAG1, DDIAS, DENND2D, DGAT1, DUSP14, DUSP16, EGLN1, EGR1, EIF2AK2, ELK3, ETV5, ETV6, FCER2, FGFR1, FYN, GADD45A, GADD45B, GBP3, GCH1, GCLC, GKAP1, GLS, GM2A, GNAI2, GPX4, GSK3B, HDAC9, HERC1, HEXB, HIVEP1, HSPA1A/HSPA1B, ICAM1, IER3, IFI16, IFIH1, IFIT5, IKBKE, IL10, IL10RA, IRF5, IRF7, IRS2, ITGAL, ITPR1, JUND, KLF2, KMO, KYNU, L3MBTL3, LDHA, LFNG, LPL, LSS, LTB, MAP2K3, MAP2K6, MAP3K14, MAP4K4, MARCKSL1, MEF2C, MPC1, NCF2, NME1, NOD2, NOTCH1, NR4A3, NRARP, NRROS, OAS2, OAS3, PARP14, PCNA, PDE7B, PDIA4, PECAM1, PIK3CG, PILRB, PLK2, PTPRC, QKI, RANBP9, RAPGEF5, RFTN1, RFX5, RGS2, RND1, SAMD9, SAT1, SCD, SELL, SELP, SIRT1, SKI, SLC11A2, SLC35B2, SLC7A1, SMPD1, SOD1, SORBS1, ST3GAL5, ST6GAL1, ST8SIA4, STAT1, STMN1, TERF2IP, TGFB1, TNFRSF10D, TNFSF9, TP53INP1, TSHZ1, UCP2, VAV3, VCL, VIM, WNT10A, ZFP36 |
| IRF7  | transcripti on regulator | Inhibited | -3.297 | 0.0000139   | BCL2L1, CASP4, CD69, CD80, CTLA4, GBP3, GBP4, IFI16, IFIH1, IFITM2, IRF7, ISG20, NMI, OAS2, OAS3, PARP14, PLAC8, RTP4, SAMD9L, SAP30, STAT1, TRIM21, XAF1, ZC3HAV1                                                                                                                                                                                                                                                                                                                                                                                                                                                                                                                                                                                                                                                                                                                                                                                                                                                                                                   |
| BRD4  | kinase                   | Inhibited | -3.202 | 0.000111    | ACSL5, ACSM3, ADAT2, BCL2L1, DCPS, DCTPP1, GTF3C6, KCNA3, MTHFD1L, MTMR2, NME1, RRS1, SFXN4, TTC27, ZNF485                                                                                                                                                                                                                                                                                                                                                                                                                                                                                                                                                                                                                                                                                                                                                                                                                                                                                                                                                           |

|                  |                         |           |        |             |                                                                                                                                                                                                                                                                                                                                                          |
|------------------|-------------------------|-----------|--------|-------------|----------------------------------------------------------------------------------------------------------------------------------------------------------------------------------------------------------------------------------------------------------------------------------------------------------------------------------------------------------|
| Interferon alpha | group                   | Inhibited | -3.097 | 0.000406    | ANXA5, APOL3, BCL2L1, BST2, CD69, CD80, CD81, CD86, DAG1, EIF2AK2, GBP3, GLS, ICAM1, IFI16, IFIH1, IFITM2, IFNLR1, IKBKE, IL10, IL10RA, IRF5, IRF7, ISG20, LILRB4, mir-29, MND4, NFIL3, NMI, OAS2, PNPT1, PRKACA, RNASEL, STAT1, TGFB1, TLR1, TRIM21, WARS, ZC3HAV1                                                                                      |
| EGLN             | group                   | Inhibited | -3.039 | 0.00254     | ALDOC, APAF1, BNIP3, EGLN1, FAM117B, FTL, FYN, GAPDH, GYS1, LDHA, SAP30, TPI1, ZNF337                                                                                                                                                                                                                                                                    |
| CD2              | transmembrane receptor  | Inhibited | -2.975 | 0.000508    | CD48, CD80, CD86, ICAM1, IL10, ITGAL, PTPRC, SELL, STAT1                                                                                                                                                                                                                                                                                                 |
| lfn              | group                   | Inhibited | -2.934 | 0.000143    | CD69, CD80, CD86, EIF2AK2, ICAM1, IFI16, IFIH1, IL10, IL10RA, IRF7, ISG20, OAS2, OAS3, PECAM1, RNASEL, STAT1, TLR1, TRIM21                                                                                                                                                                                                                               |
| STAT1            | transcription regulator | Inhibited | -2.884 | 0.085       | APOL6, BCL2L1, CASP4, CCL4, CD86, EGR1, EIF2AK2, FOXO1, GBP3, HERC6, ICAM1, IFI16, IFITM2, IL10, IRF5, IRF7, OAS2, PARP9, PECAM1, SAMHD1, SP110, STAT1, WARS                                                                                                                                                                                             |
| CD40LG           | cytokine                | Inhibited | -2.812 | 0.000000694 | ALCAM, ALG3, BATF, BCL2L1, BNIP3, CCL4, CD27, CD69, CD80, CD86, CELF2, CFLAR, EGR1, EIF2AK2, GADD45A, GCH1, GPR183, HDDC2, HLA-DQB1, HSPA1A/HSPA1B, ICAM1, IL10, IL10RA, IL13RA1, IL1RAP, IPO8, IRF2, JUND, LTA, LTB, MAP2K3, MARCKSL1, MPHOSPH9, NR4A3, PLEK, RAD50, RGS2, SELL, SELP, SLAMF1, STAT1, TM7SF2, TNFRSF13B, TNFSF4, TNFSF9, TNPO1, ZFP36L1 |
| MGEA5            | enzyme                  | Inhibited | -2.785 | 0.025       | ACTG1, ACTN4, ALDOC, ALOX5AP, BCL2L1, CD48, CD86, CDCA7L, CREB3L2, FGFR1, FLNA, FLNB, G6PD, GADD45A, GLUL, GTF3A, HSDL1, LSS, MAP3K3, NOTCH2, OGDH, PIK3R1, RAP2A, SORBS1, STAT1, TGFB1, TSPAN5, TUBA1A, TUBA4A, VIM                                                                                                                                     |
| FLT3LG           | cytokine                | Inhibited | -2.773 | 0.00861     | ADGRE5, CD80, CD86, ICAM1, IL10, PAX5, PTPRC, TCF4                                                                                                                                                                                                                                                                                                       |
| lfnar            | group                   | Inhibited | -2.64  | 0.00346     | CD86, EIF2AK2, IFI16, IFIH1, IRF7, ISG20, OAS2, PNPT1, STAT1, TRIM21, UNC93B1, XAF1                                                                                                                                                                                                                                                                      |
| RBL2             | other                   | Inhibited | -2.598 | 0.11        | CASP4, CCNF, CHKA, GSK3B, KPNA2, MAP2K3, MAP3K14, PCNA, STMN1                                                                                                                                                                                                                                                                                            |
| EBI3             | cytokine                | Inhibited | -2.596 | 0.0163      | CD80, CD86, HLA-DMB, HLA-DOB, ICAM1, IL10, STAT1                                                                                                                                                                                                                                                                                                         |
| IL12 (complex)   | complex                 | Inhibited | -2.589 | 0.0248      | BCL2L1, CCL4, CD69, CD86, GADD45B, GCNT2, ICAM1, IFIH1, IL10, ISG20, ITGAL, LTA, LTB, PLAC8, SELL, SELP, SET, TGFB1, TXK                                                                                                                                                                                                                                 |
| IRF3             | transcription regulator | Inhibited | -2.534 | 0.000648    | B4GALT5, BTLA, CCL4, CD69, CD86, DDX60, EIF2AK2, IFI16, IFIH1, IL10, IRF5, IRF7, ISG20,                                                                                                                                                                                                                                                                  |

|        |                         |           |       |             |                                                                                                                                                                                                                                                                                                                                                                                                                                                                |
|--------|-------------------------|-----------|-------|-------------|----------------------------------------------------------------------------------------------------------------------------------------------------------------------------------------------------------------------------------------------------------------------------------------------------------------------------------------------------------------------------------------------------------------------------------------------------------------|
|        |                         |           |       |             | OAS2, OAS3, PARP14, PLAC8, PNP, SAMD9L, SAP30, STAT1, TNFSF4, VIM                                                                                                                                                                                                                                                                                                                                                                                              |
| IL5    | cytokine                | Activated | 2.453 | 0.000000184 | ALDOC, ANXA2, BCL2L1, BNIP3, BNIP3L, CASP4, CD69, CYSLTR1, DDX21, EAF2, EGLN1, EGR1, ELL2, FAM65B, GADD45A, GBP4, GLIPR2, HSPH1, ICAM1, IER3, IFI30, IL13RA1, IRF7, LFNG, LTA, LTB, NABP1, NDRG1, NFIL3, P4HA1, PAX5, PTPRC, QSOX1, SAP30, TGFB1, TLR1, TPI1, VIM, ZNF443                                                                                                                                                                                      |
| FOXO1  | transcription regulator | Activated | 2.477 | 0.143       | CCNE2, CCNF, CDKN3, HIST1H2BG, LDHA, MAPK8, PCNA, PECAM1, STMN1, VIM                                                                                                                                                                                                                                                                                                                                                                                           |
| Nr1h   | group                   | Activated | 2.517 | 0.00957     | ABCD2, ERCC8, HLA-DOB, IFIH1, IL10, ITGAL, ITPR1, LAT2, LPL, LTB, MARCKSL1, MYLIP, NPC1, SCD, SELP, SP110                                                                                                                                                                                                                                                                                                                                                      |
| EGR2   | transcription regulator | Activated | 2.534 | 0.0446      | BNIP3L, CHKA, EGR1, FCER2, GOLGB1, GTF2A1, HOMER1, IL10, MAP2, NOTCH1, RALGAPA1, SCD, SLC12A2, SLC16A1                                                                                                                                                                                                                                                                                                                                                         |
| ARNT   | transcription regulator | Activated | 2.538 | 0.00063     | ALDOC, BNIP3, CD81, G6PD, GAPDH, IL10, IRS2, LDHA, MYO1C, OAZ1, PDPK1, PGM2, S1PR1, SELL, TPI1, TUBA4A, VIM                                                                                                                                                                                                                                                                                                                                                    |
| SMAD4  | transcription regulator | Activated | 2.597 | 0.519       | CELF2, GADD45A, GADD45B, ICAM1, IER3, IL10, PTPRC, SCD, SERTAD1, SLC25A4, TGFB1, VIM, ZFP36                                                                                                                                                                                                                                                                                                                                                                    |
| TRIM24 | transcription regulator | Activated | 2.685 | 0.000297    | DDX60, EPSTI1, GBP3, GBP4, GLUL, HERC6, HNF1B, IFIH1, IRF7, NMI, PLAC8, RTP4, SAMD9L, SAMHD1, STAT1                                                                                                                                                                                                                                                                                                                                                            |
| CREM   | transcription regulator | Activated | 2.724 | 0.0467      | CD86, DUSP14, EGR1, GADD45B, IRS2, LSS, MEST, MIDN, MKNK2, NFIL3, NOTCH1, SERTAD1, SLC16A1, TIPARP                                                                                                                                                                                                                                                                                                                                                             |
| ERBB2  | kinase                  | Activated | 2.802 | 0.00104     | ABHD5, ALDOC, ANXA2, APLP2, ATP1B3, BAG2, BCKDHB, BCL2L1, BNIP3, CCL4, CCNE2, CDCA7L, CDKN3, CHD4, DAAM1, DAG1, DDX10, DGAT1, DTX1, EGR1, ELK3, ELL2, EPSTI1, ETV5, ETV6, FOXO1, G3BP1, GART, GLS, GSK3B, GTF3A, HIST1H4C, HMGB2, HSPA1A/HSPA1B, IGF2R, IKBKB, LPCAT1, MAN1A1, MAP2K3, MGAT5, MKNK2, MLXIP, MPHOSPH9, NDRG1, NOTCH1, PCNA, PDIA4, PDPK1, PFKFB3, PLAC8, POLE, POLK, POLR1B, POLR2A, POLR2L, QKI, SIRPA, SLC4A7, SORBS1, TUBA1A, VCL, VIM, WSB2 |
| E2F1   | transcription regulator | Activated | 2.842 | 1.08E-08    | ABC1, ACSL5, APAF1, ATAD2, BCL2L1, BID, BNIP3, CALM1 (includes others), CALR, CCNE2, CCNF, CFLAR, CWC27, EGR1, EIF2AK2, EXOSC9, EZH2, FANCD2, FGFR1, FOXO1, FOXO3, GM2A, HIST1H2AC, HIST1H2AE, HIST1H2BJ, HIST1H4H,                                                                                                                                                                                                                                            |

|          |                                   |           |       |             |                                                                                                                                                                                                                                                                  |
|----------|-----------------------------------|-----------|-------|-------------|------------------------------------------------------------------------------------------------------------------------------------------------------------------------------------------------------------------------------------------------------------------|
|          |                                   |           |       |             | HIST2H2AA3/HIST2H2AA4, HLTF, HMGB2, HN1, ICAM1, IRS2, KCNA3, LTA4H, MAP3K14, MGEA5, mir-223, MTHFD1, NMI, NUSAP1, PCNA, PIK3R1, PKNOX1, PLK2, PPP1R13B, QKI, RCOR1, RYBP, SERTAD2, STMN1, TGFB1, TNFSF9, TP53INP1, TRIM28, TRMT13, UCP2, VCP, VIM, YARS, ZFP36   |
| XBP1     | transcription regulator           | Activated | 2.852 | 0.181       | APP, CALR, CAT, CRK, DNAJC1, DNAJC3, ERO1B, GOLGB1, ICAM1, MAP1LC3B, P3H1, PDIA4, S1PR1, SOD1, STARD5                                                                                                                                                            |
| MKNK1    | kinase                            | Activated | 2.887 | 0.0112      | ANXA2, ANXA5, FLNA, FLNB, IFRD1, KIF1B, MAN2A1, NR4A3, PDLIM5, STXBP1, TTC3, VIM                                                                                                                                                                                 |
| NFE2L2   | transcription regulator           | Activated | 2.899 | 0.000941    | ABCB4, ACSL5, ACTG1, ARHGEF3, ATP1A1, BCL2L1, BNIP3, CAT, CD86, CLPP, CREG1, DNAJC3, DYNLL1, ESD, ETV6, FKBP5, FOXO3, FTL, G6PD, GCLC, GNAI2, IFRD1, IL10, LPL, MAP1LC3B, MEF2C, NCF2, OAT, PDIA4, PGD, PKIA, PTPRO, RRS1, SAT1, SLC30A4, SOD1, TGFB1, TPI1, VCP |
| ESRRA    | ligand-dependent nuclear receptor | Activated | 2.941 | 0.189       | ACOX1, ALDOC, ASAH1, CHKA, FAM102A, GAPDH, IKZF3, LDHA, LPL, MED24, PDP1, SIRT1, TPI1                                                                                                                                                                            |
| GH1      | growth factor                     | Activated | 3.077 | 0.387       | CAT, EGR1, GADD45A, GCLC, LPL, NRAS, PCNA, SIRT1, SKI, SOD1, TUBA1A, VIM, XRCC1, ZFP36                                                                                                                                                                           |
| IL1RN    | cytokine                          | Activated | 3.2   | 0.0174      | ERAP2, HDAC9, HERC6, HLA-DQB1, ICAM1, IFIH1, IFIT5, IL10, IRF7, ISG20, OAS2, OAS3, RTP4, SAMD9                                                                                                                                                                   |
| PPARG    | ligand-dependent nuclear receptor | Activated | 3.209 | 0.0592      | ACOX1, ACSL5, APAF1, APP, ASAP1, BCL2L1, CAT, CPT1A, DGAT1, EGLN1, GAPDH, ICAM1, IL10, IRS2, LPL, MANBA, MAP2, MKNK2, MRTO4, NDRG1, PCNA, PECAM1, PFKFB3, RAPGEF1, SAT1, SCD, SLC44A1, SLC9A1, SOD1, SORBS1, TCF4, UCP2, VIM, WIPF1, XYLT1                       |
| CD38     | enzyme                            | Activated | 3.229 | 0.0000025   | ALDOC, ANXA2, BNIP3, BNIP3L, CD86, EAF2, EGLN1, ELL2, GBP4, GLIPR2, ICAM1, IFI30, LFNG, LTA, NABP1, NDRG1, NFIL3, P4HA1, PAX5, PPP3CA, SAP30, SELL, TPI1, VIM, ZNF443                                                                                            |
| PPARGC1A | transcription regulator           | Activated | 3.608 | 0.276       | ACOX1, BNIP3, CALM1 (includes others), CAT, CPT1A, DGAT1, GSK3B, IL10, IRS2, LDHA, LPL, NRF1, PNPLA2, SCD, SOD1, UCP2                                                                                                                                            |
| FOXO3    | transcription regulator           | Activated | 3.684 | 0.000000703 | APAF1, BNIP3, BNIP3L, CASP4, CAT, CCNE2, CDKN3, CFLAR, CPT1A, EGR1, FOXO1, FOXO3, GADD45A, GADD45B, GCLC, GLUL, IARS, IER3, IFIH1, IL10, IMPDH2, IRS2, LARS, MEF2C, MXD1, PCNA, PPRC1, RTN3, RTN4, SESN1, SLC7A1, SOD1, TGFB1, TP53INP1,                         |



|  |  |  |  |  |           |
|--|--|--|--|--|-----------|
|  |  |  |  |  | UCP2, VIM |
|--|--|--|--|--|-----------|

**Table S7A.** The top 20 canonical pathways identified by IPA for 142 genes contained within SEs that are ranked lower in 3 out of 4 CLL patient samples after *ex-vivo* PLX51107 treatment.

| Ingenuity Canonical Pathways                              | p-value     | Molecules                                                       |
|-----------------------------------------------------------|-------------|-----------------------------------------------------------------|
| Th1 and Th2 Activation Pathway                            | 6.30957E-07 | IL10, IKZF1, IL10RA, HLA-DQA1, IL2RA, SPI1, IL24, mir-21, IL2RB |
| Th2 Pathway                                               | 1.31826E-06 | IL10, IKZF1, HLA-DQA1, IL2RA, SPI1, IL24, mir-21, IL2RB         |
| T Helper Cell Differentiation                             | 4.46684E-05 | IL10, IL10RA, HLA-DQA1, IL2RA, BCL6                             |
| Molecular Mechanisms of Cancer                            | 0.00019     | ZBTB17, RAC2, RAPGEF1, PMAIP1, TCF4, CCND2, PRKAR1B, RHOH, BCL2 |
| Antigen Presentation Pathway                              | 0.00105     | B2M, NLRC5, HLA-DQA1                                            |
| Leukocyte Extravasation Signaling                         | 0.00575     | RAC2, CD44, RASSF5, RHOH, SELPLG                                |
| Th1 Pathway                                               | 0.00589     | IL10, IL10RA, HLA-DQA1, mir-21                                  |
| Ovarian Cancer Signaling                                  | 0.00741     | TCF4, CD44, PRKAR1B, BCL2                                       |
| Allograft Rejection Signaling                             | 0.01023     | B2M, IL10, HLA-DQA1                                             |
| OX40 Signaling Pathway                                    | 0.01175     | B2M, HLA-DQA1, BCL2                                             |
| Cytotoxic T Lymphocyte-mediated Apoptosis of Target Cells | 0.01230     | B2M, BCL2                                                       |
| Death Receptor Signaling                                  | 0.01259     | PARP15, PARP9, BCL2                                             |
| Hepatic Fibrosis / Hepatic Stellate Cell Activation       | 0.01738     | IL10, IL10RA, ECE1, BCL2                                        |
| Protein Kinase A Signaling                                | 0.01995     | TCF4, PTPRJ, PTPN1, PRKAR1B, UBASH3B, PDE4B                     |
| p53 Signaling                                             | 0.02089     | PMAIP1, CCND2, BCL2                                             |
| IL-8 Signaling                                            | 0.02188     | RAC2, CCND2, RHOH, BCL2                                         |
| Netrin Signaling                                          | 0.02239     | RAC2, PRKAR1B                                                   |
| Neuroprotective Role of THOP1 in Alzheimer's Disease      | 0.02455     | PRKAR1B, ECE1                                                   |
| Autoimmune Thyroid Disease Signaling                      | 0.02754     | IL10, HLA-DQA1                                                  |
| iCOS-iCOSL Signaling in T Helper Cells                    | 0.02951     | HLA-DQA1, IL2RA, IL2RB                                          |

**Table S7B.** The top upstream regulators (activation z-score>2) predicted by IPA for 142 genes contained within SEs that are ranked lower in 3 out of 4 CLL patient samples after *ex-vivo* PLX51107 treatment

| Upstream Regulator | Molecule Type           | Predicted Activation State | Activation z-score | p-value of overlap | Target molecules in dataset                                                                                 |
|--------------------|-------------------------|----------------------------|--------------------|--------------------|-------------------------------------------------------------------------------------------------------------|
| STAT3              | transcription regulator | Inhibited                  | -2.047             | 0.0000002          | BATF, BCL2, BCL6, BMF, CCND2, HLA-DQA1, IKZF3, IL10, IL2RA, IL2RB, mir-21, PMAIP1, SERPINB1, SERPINB9, TCF4 |
| CD3                | complex                 | Activated                  | 2.097              | 0.0000003          | BATF, BCL2, BCL6, CCND2, CD44, CKS2, DAD1, IL10, IL2RA, IL2RB, PDE4B, PTPRJ, RAC2, RHOH, SELPLG, SRP14      |
| BCL6               | transcription regulator | Activated                  | 2.308              | 0.0000016          | BCL2, BCL6, CCND2, CD44, IL10, IL24, IL2RA, IL2RB, LPP                                                      |
| IL21               | cytokine                | Inhibited                  | -2.574             | 0.0000043          | BATF, BCL2, BCL6, CCND2, IL10, IL2RA, IL2RB, mir-21                                                         |
| IL4                | cytokine                | Inhibited                  | -2.111             | 0.0000338          | BCL11A, BCL2, BCL6, CCND2, CD44, IL10, IL10RA, IL24, IL2RA, IL2RB, mir-21, PDE4B, PIGR, SELPLG, ST6GAL1     |
| CSF2               | cytokine                | Inhibited                  | -2.941             | 0.000222           | BCL2, IL10, IL24, IL2RA, mir-21, PDE4B, RHOH, SERPINB9, SPI1, TCF4                                          |
| STAT5B             | transcription regulator | Inhibited                  | -2.191             | 0.000275           | BCL2, BCL6, CCND2, IL24, IL2RA, IL2RB                                                                       |

|       |                         |           |        |          |                                                                |
|-------|-------------------------|-----------|--------|----------|----------------------------------------------------------------|
| CBFB  | transcription regulator | Activated | 2      | 0.000675 | IKZF3, IL2RA, IL2RB, SLC25A19                                  |
| Nr1h  | group                   | Activated | 2      | 0.00871  | BCL2, CCND2, ECE1, IL10                                        |
| IL1   | group                   | Inhibited | -2.412 | 0.0115   | BCL2, IL10, IL2RA, IL2RB, mir-21, PIGR                         |
| ERBB2 | kinase                  | Inhibited | -2.371 | 0.021    | BCL2, BTG2, CCND2, CDC42EP3, CKS2, ETV6, LPCAT1, mir-21, PTPN1 |
| Creb  | group                   | Inhibited | -2.195 | 0.024    | BCL2, DDX6, IL10, mir-21, PDE4B                                |
| MGEA5 | enzyme                  | Inhibited | -2     | 0.137    | BCL2, CD44, PRKAR1B, SERPINB9                                  |
| NUPR1 | transcription regulator | Activated | 2      | 0.286    | ETV6, JADE2, PARP9, PTPRJ                                      |

**Table S7C.** The top bio-functions (activation z-score >2) predicted by IPA for 142 genes contained within SEs that are ranked lower in 3 out of 4 CLL patient samples after *ex-vivo* PLX51107 treatment.

| Diseases or Functions Annotation        | Predicted Activation State | Activation z-score | p-Value  | Molecules                                                                                                                                                                                                                  |
|-----------------------------------------|----------------------------|--------------------|----------|----------------------------------------------------------------------------------------------------------------------------------------------------------------------------------------------------------------------------|
| leukopoiesis                            | Decreased                  | -2.964             | 7.25E-14 | ARID5B, B2M, BATF, BCL11A, BCL2, BCL6, CCND2, CD44, EIF2AK4, ETV6, HLA-DQA1, IGKC, IKZF1, IKZF3, IL10, IL10RA, IL2RA, IL2RB, LAIR1, MAPKAPK2, mir-21, PTPRJ, RAC2, RASSF5, RHOH, SLAMF6, SMARCE1, SPEN, SPI1, TCF4, ZBTB17 |
| hematopoiesis of mononuclear leukocytes | Decreased                  | -2.576             | 3.94E-13 | ARID5B, B2M, BATF, BCL11A, BCL2, BCL6, CCND2, CD44, EIF2AK4, ETV6, HLA-DQA1, IGKC, IKZF1, IKZF3, IL10, IL10RA, IL2RA, IL2RB, LAIR1, PTPRJ, RASSF5, RHOH, SLAMF6, SMARCE1, SPEN, SPI1, TCF4, ZBTB17                         |
| lymphopoiesis                           | Decreased                  | -2.744             | 6.21E-13 | ARID5B, B2M, BATF, BCL11A, BCL2, BCL6, CCND2, CD44, EIF2AK4, ETV6, HLA-DQA1, IGKC, IKZF1, IKZF3, IL10, IL10RA, IL2RA, IL2RB, PTPRJ, RASSF5, RHOH, SLAMF6, SMARCE1, SPEN, SPI1, TCF4, ZBTB17                                |
| dendropoiesis                           | Decreased                  | -2.007             | 1.05E-09 | BATF, BCL11A, BCL6, EIF2AK4, IKZF1, IL10, IL2RA, IL2RB, LAIR1, mir-21, SPI1                                                                                                                                                |
| development of antigen presenting cells | Decreased                  | -2.378             | 1.2E-09  | BATF, BCL11A, BCL6, EIF2AK4, IKZF1, IL10, IL2RA, IL2RB, LAIR1, MAPKAPK2, mir-21, SPI1                                                                                                                                      |
| homeostasis of leukocytes               | Decreased                  | -3.057             | 2.01E-09 | B2M, BATF, BCL11A, BCL2, BCL6, BMF, EIF2AK4, HLA-DQA1, IGKC, IKZF1, IL10, IL10RA, IL2RA, IL2RB, PDE4B, RHOH, SLAMF6, SMARCE1, SPI1, TCF4, ZBTB17                                                                           |
| differentiation of T lymphocytes        | Decreased                  | -3.169             | 2.35E-09 | B2M, BATF, BCL11A, BCL2, BCL6, EIF2AK4, HLA-DQA1, IKZF1, IL10, IL2RA, IL2RB, RHOH, SLAMF6, SMARCE1, SPI1, TCF4, ZBTB17                                                                                                     |
| T cell homeostasis                      | Decreased                  | -2.784             | 3.88E-09 | B2M, BATF, BCL11A, BCL2, BCL6, BMF, EIF2AK4, HLA-DQA1, IGKC, IKZF1, IL10, IL10RA, IL2RA, IL2RB, RHOH, SLAMF6, SMARCE1, SPI1, TCF4, ZBTB17                                                                                  |
| development of phagocytes               | Decreased                  | -2.706             | 7.34E-09 | BATF, BCL11A, BCL2, BCL6, EIF2AK4, IKZF1, IL10, IL2RA, IL2RB, LAIR1, MAPKAPK2, mir-21, SPI1                                                                                                                                |
| hematopoiesis of phagocytes             | Decreased                  | -2.378             | 8.56E-09 | BATF, BCL11A, BCL2, BCL6, EIF2AK4, IKZF1, IL10, IL2RA, IL2RB, LAIR1, mir-21, SPI1                                                                                                                                          |
| T cell development                      | Decreased                  | -2.598             | 1.59E-08 | B2M, BATF, BCL11A, BCL2, BCL6, EIF2AK4, HLA-DQA1, IGKC, IKZF1, IL10, IL10RA, IL2RA, IL2RB, RHOH, SLAMF6, SMARCE1, SPI1, TCF4, ZBTB17                                                                                       |
| differentiation of antigen              | Decreased                  | -2.033             | 1.93E-08 | BATF, BCL11A, BCL2, BCL6, EIF2AK4, IKZF1,                                                                                                                                                                                  |

|                                     |           |        |            |                                                                                                                                                                                                                                                                                                                                                                                                                                                                                                                                                                                                                                                                                                                                                                                                              |
|-------------------------------------|-----------|--------|------------|--------------------------------------------------------------------------------------------------------------------------------------------------------------------------------------------------------------------------------------------------------------------------------------------------------------------------------------------------------------------------------------------------------------------------------------------------------------------------------------------------------------------------------------------------------------------------------------------------------------------------------------------------------------------------------------------------------------------------------------------------------------------------------------------------------------|
| presenting cells                    |           |        |            | IL10, IL2RA, IL2RB, LAIR1, mir-21, SPI1                                                                                                                                                                                                                                                                                                                                                                                                                                                                                                                                                                                                                                                                                                                                                                      |
| cell proliferation of T lymphocytes | Increased | 3.125  | 2.59E-08   | ADORA2A, B2M, BATF, BCL2, CD44, HLA-DQA1, IKZF1, IKZF3, IL10, IL2RA, IL2RB, LAIR1, PTPRJ, RAC2, RASSF5, RHOH, SERPINB9, SPI1, TIGIT, ZC3H12D                                                                                                                                                                                                                                                                                                                                                                                                                                                                                                                                                                                                                                                                 |
| anemia                              | Increased | 2.188  | 0.00000018 | ADORA2A, BCL2, CCND2, CDC42EP3, DAD1, GRHPR, HLA-DQA1, IKZF1, IL10, IL2RA, IL2RB, PTPRJ, RAC2, SLC25A19, SPI1                                                                                                                                                                                                                                                                                                                                                                                                                                                                                                                                                                                                                                                                                                |
| hypoplasia of lymphoid organ        | Increased | 2.949  | 0.00000048 | ARID5B, BCL11A, BCL6, IGKC, IKZF1, IL10, IL2RB, RASSF5, RHOH                                                                                                                                                                                                                                                                                                                                                                                                                                                                                                                                                                                                                                                                                                                                                 |
| abdominal neoplasm                  | Increased | 2.126  | 0.00000212 | ADORA2A, APOBEC3D, APOBEC3F, APOBEC3H, ARID5B, B2M, BATF, BCL11A, BCL2, BCL6, BTG2, C1orf186, C1QTNF6, CBX7, CCND2, CD44, CDC42EP3, CHIT1, CKS2, CORO1C, CYTOR, DAD1, DDX6, DTX3L, ECE1, EIF2AK4, EIF2D, ETV6, FAM167A, FAM53B, FAM60A, FGD2, GPR107, GRHPR, HERPUD1, HLA-DQA1, IGHA2, IGKC, IKZF1, IL10, IL10RA, IL24, IL2RA, IL2RB, JAZF1, KLHDC7B, LDLRAD4, LILRA4, LILRA5, LPCAT1, LPP, MAPKAPK2, MCTP2, MIF4GD, mir-21, MSI2, MTSS1, NLRC5, NSMCE1, NUBP1, PARP15, PATL2, PDE4B, PIGR, PLEKHG1, PMAIP1, PPP1R16B, PRKAR1B, PTPN1, PTPRJ, RAD51B, RAPGEF1, RASSF5, RBM17, RHOH, SECISBP2, SELPLG, SERPINB1, SERPINB9, SLAMF6, SLC39A13, SMAP2, SPEN, SPI1, SSTR3, ST6GAL1, SUSD1, TAGAP, TCF4, TCTN1, TIGIT, TRIM69, TVP23A, UBASH3B, USP3, VMP1, VOPP1, XXYLT1, ZBTB17, ZBTB20, ZC3H12D, ZCCHC7, ZMYND8 |
| hypoplasia of organ                 | Increased | 3.216  | 0.00000247 | ARID5B, BCL11A, BCL2, BCL6, CCND2, ECE1, IGKC, IKZF1, IL10, IL2RB, PTPRJ, RASSF5, RHOH, SPEN                                                                                                                                                                                                                                                                                                                                                                                                                                                                                                                                                                                                                                                                                                                 |
| morbidity or mortality              | Increased | 3.531  | 0.0000037  | ADORA2A, ARID5B, B2M, BCL11A, BCL2, BCL6, BMF, CCND2, CD44, CKS2, DAD1, ECE1, EIF2AK4, ETV6, FCMR, GPR107, IKZF3, IL10, IL2RA, IL2RB, MAPKAPK2, mir-21, MTSS1, NUBP1, PDE4B, PTPN1, PTPRJ, RAC2, RAD51B, RAPGEF1, RASSF5, SECISBP2, SERPINB1, SLAMF6, SLC25A19, SPEN, SPI1, TCF4, ZBTB17, ZBTB20                                                                                                                                                                                                                                                                                                                                                                                                                                                                                                             |
| cellular homeostasis                | Decreased | -2.981 | 0.00000421 | ADORA2A, B2M, BATF, BCL11A, BCL2, BCL6, BMF, EIF2AK4, HERPUD1, HLA-DQA1, IGKC, IKZF1, IL10, IL10RA, IL24, IL2RA, IL2RB, NUBP1, PDE4B, PMAIP1, PTPRJ, RAC2, RHOH, SLAMF6, SLC39A13, SMARCE1, SPI1, TCF4, UBASH3B, VMP1, ZBTB17                                                                                                                                                                                                                                                                                                                                                                                                                                                                                                                                                                                |
| quantity of plasma cells            | Increased | 2.219  | 0.0000257  | FCMR, IL10, IL2RB, RAC2, RASSF5                                                                                                                                                                                                                                                                                                                                                                                                                                                                                                                                                                                                                                                                                                                                                                              |

**Table S8A.** The top 20 canonical pathways identified by IPA for 106 genes that are directly regulated by BRD4.

| Ingenuity Canonical Pathways   | p-value | Molecules                            |
|--------------------------------|---------|--------------------------------------|
| tRNA Charging                  | 0.00047 | LARS, GARS, LARS2, IARS              |
| Th2 Pathway                    | 0.00052 | STAT6, IKZF1, HLA-DQB1, JAK3, mir-21 |
| IL-4 Signaling                 | 0.00069 | STAT6, NRAS, HLA-DQB1, JAK3          |
| Th1 and Th2 Activation Pathway | 0.00138 | STAT6, IKZF1, HLA-DQB1, JAK3, mir-21 |

|                                                                              |         |                              |
|------------------------------------------------------------------------------|---------|------------------------------|
| Role of JAK1 and JAK3 in $\gamma$ c Cytokine Signaling                       | 0.00372 | STAT6, NRAS, JAK3            |
| TREM1 Signaling                                                              | 0.00457 | TLR6, TLR1, CCL3             |
| IL-15 Signaling                                                              | 0.00468 | STAT6, NRAS, JAK3            |
| Colorectal Cancer Metastasis Signaling                                       | 0.00501 | NRAS, GRK3, TLR6, TLR1, JAK3 |
| JAK/Stat Signaling                                                           | 0.00575 | STAT6, NRAS, JAK3            |
| Communication between Innate and Adaptive Immune Cells                       | 0.00724 | TLR6, TLR1, CCL3             |
| Altered T Cell and B Cell Signaling in Rheumatoid Arthritis                  | 0.00724 | TLR6, TLR1, HLA-DQB1         |
| Oncostatin M Signaling                                                       | 0.00977 | NRAS, JAK3                   |
| UVA-Induced MAPK Signaling                                                   | 0.01047 | NRAS, PARP15, PARP9          |
| Primary Immunodeficiency Signaling                                           | 0.01862 | RFX5, JAK3                   |
| Th1 Pathway                                                                  | 0.02188 | HLA-DQB1, JAK3, mir-21       |
| Role of Pattern Recognition Receptors in Recognition of Bacteria and Viruses | 0.02239 | OAS2, TLR6, TLR1             |
| Pyrimidine Ribonucleotides Interconversion                                   | 0.02344 | NME1, CTPS2                  |
| Retinoic acid Mediated Apoptosis Signaling                                   | 0.03236 | PARP15, PARP9                |
| IL-2 Signaling                                                               | 0.03388 | NRAS, JAK3                   |
| Pyrimidine Ribonucleotides De Novo Biosynthesis                              | 0.03467 | NME1, CTPS2                  |

**Table S8B.** The top upstream regulators (activation z-score >2) predicted by IPA for 106 genes that are directly regulated by BRD4.

| Upstream Regulator | Molecule Type           | Predicted Activation State | Activation z-score | p-value of overlap | Target molecules in dataset                                                                                                    |
|--------------------|-------------------------|----------------------------|--------------------|--------------------|--------------------------------------------------------------------------------------------------------------------------------|
| Interferon alpha   | group                   | Inhibited                  | -2.513             | 0.000379           | CCL3, CCND2, IFI16, LILRB4, mir-21, MX2, OAS2, TLR1                                                                            |
| IFN Beta           | group                   | Inhibited                  | -2.164             | 0.000398           | CCL3, IFI16, MX2, OAS2, XAF1                                                                                                   |
| BCR (complex)      | complex                 | Inhibited                  | -2.18              | 0.00044            | CCL3, CCND2, CLEC2D, FCMR, KCNN4                                                                                               |
| STAT1              | transcription regulator | Inhibited                  | -2.433             | 0.00008            | APOL6, CCL3, CCND2, HERC6, IFI16, OAS2, PARP9, SP110                                                                           |
| PRL                | cytokine                | Inhibited                  | -2.828             | 0.0000485          | DTX3L, EPSTI1, HERC6, MX2, OAS2, SP110, TMEM140, XAF1                                                                          |
| VEGFA              | growth factor           | Inhibited                  | -2.186             | 0.0101             | BATF, CTLA4, MRPL3, NME1, TLR1                                                                                                 |
| IFNL1              | cytokine                | Inhibited                  | -2.449             | 0.00000125         | APOL6, DDX60, HERC6, OAS2, SP110, TMEM140                                                                                      |
| IL21               | cytokine                | Inhibited                  | -2.414             | 0.000147           | BATF, CCND2, HERC6, IFI16, mir-21, OAS2                                                                                        |
| CSF2               | cytokine                | Inhibited                  | -2.771             | 0.00145            | CCL3, CD180, CTLA4, GRK3, HLA-DQB1, mir-21, TIFA, TLR1                                                                         |
| TNF                | cytokine                | Inhibited                  | -2.761             | 0.00797            | AIMP1, ARID5B, BTN3A3, CCL3, CCND2, CTLA4, DENND2D, ELK3, ETV6, IFI16, mir-21, NCF2, NME1, OAS2, RFX5, TIFA                    |
| TGM2               | enzyme                  | Inhibited                  | -2.607             | 0.0000901          | CCL3, DDX60, NCF2, OAS2, PARP9, SP110, XAF1                                                                                    |
| IRF7               | transcription regulator | Inhibited                  | -2.2               | 0.00096            | CTLA4, IFI16, MX2, OAS2, XAF1                                                                                                  |
| MSC                | transcription regulator | Inhibited                  | -2                 | 0.000137           | DDX60, EPSTI1, PAX5, XAF1                                                                                                      |
| ATF4               | transcription regulator | Inhibited                  | -2.236             | 0.000767           | ARHGAP24, BCAT1, GARS, IARS, LARS                                                                                              |
| IFNB1              | cytokine                | Inhibited                  | -2.401             | 0.00179            | BTN3A3, CCL3, IFI16, mir-21, OAS2, XAF1                                                                                        |
| IFNG               | cytokine                | Inhibited                  | -3.874             | 0.00000733         | APOL6, CCL3, CCND2, CLEC2D, DTX3L, ERCC8, HERC6, HLA-DQB1, IFI16, JAK3, MX2, NCF2, OAS2, PARP9, RFX5, SP110, STAT6, TLR1, TLR6 |
| IFNA2              | cytokine                | Inhibited                  | -3.231             | 1.06E-08           | APOL6, CCL3, DDX60, HERC6, IFI16,                                                                                              |

|        |                         |           |        |          |                                                                            |
|--------|-------------------------|-----------|--------|----------|----------------------------------------------------------------------------|
|        |                         |           |        |          | LILRB4, MX2, OAS2, PARP9, SP110, XAF1                                      |
| MYC    | transcription regulator | Inhibited | -2.329 | 0.0117   | ABCE1, BCAT1, CCND2, CD48, DDX21, IFI16, IKZF1, NME1, PAX5, PNO1, TMEM126A |
| CD3    | complex                 | Activated | 3.031  | 0.000173 | AIMP1, BATF, CCL3, CCND2, CTLA4, ELK3, HLA-DQB1, JAK3, KCNN4, NME1, XAF1   |
| NUPR1  | transcription regulator | Activated | 2.449  | 0.0288   | CTPS2, ETV6, LARS2, MX2, PARP9, RFX5                                       |
| SOCS1  | other                   | Activated | 2      | 0.00257  | CCL3, IFI16, OAS2, STAT6                                                   |
| NKX2-3 | transcription regulator | Activated | 2      | 0.0181   | DDX60, PARP9, SP110, XAF1                                                  |
| IL1RN  | cytokine                | Activated | 2      | 0.00339  | HERC6, HLA-DQB1, MX2, OAS2                                                 |

**Table S8C.** The top bio-functions (activation z-score >2) predicted by IPA for 106 genes that are directly regulated by BRD4.

| Diseases or Functions Annotation        | Predicted Activation State | Activation z-score | p-Value     | Molecules                                                                                                                                                                                                                                                                                                                                                                                                                                                                                                                                       |
|-----------------------------------------|----------------------------|--------------------|-------------|-------------------------------------------------------------------------------------------------------------------------------------------------------------------------------------------------------------------------------------------------------------------------------------------------------------------------------------------------------------------------------------------------------------------------------------------------------------------------------------------------------------------------------------------------|
| cell survival                           | Decreased                  | -3.891             | 0.000161    | ACSL5, AIMP1, ALKBH8, AMIGO2, CCL3, CD48, CTLA4, ERCC8, ETV6, FANCF, FCMR, JAK3, mir-21, NCF2, NME1, NRAS, PAX5, PFDN1, STAT6, UPF2, UTP15, XRCC4                                                                                                                                                                                                                                                                                                                                                                                               |
| cell viability                          | Decreased                  | -3.75              | 0.000171    | ACSL5, AIMP1, ALKBH8, AMIGO2, CCL3, CD48, CTLA4, ERCC8, ETV6, FANCF, FCMR, JAK3, mir-21, NCF2, NME1, NRAS, PAX5, PFDN1, UPF2, UTP15, XRCC4                                                                                                                                                                                                                                                                                                                                                                                                      |
| migration of cells                      | Decreased                  | -2.468             | 0.00946     | AIMP1, ARHGAP24, ARID5B, BATF, BCAT1, CCL3, CD48, CTLA4, DOCK10, ELK3, ETV6, IKZF1, JAK3, KCNN4, mir-21, NCF2, NME1, NRAS, PARP9, PAX5, SH2D3C, STAT6                                                                                                                                                                                                                                                                                                                                                                                           |
| leukopoiesis                            | Decreased                  | -2.439             | 0.000000196 | ARID5B, BATF, CCL3, CCND2, CTLA4, ETV6, HLA-DQB1, IFI16, IKZF1, IKZF3, JAK3, LILRB1, LILRB4, mir-21, PAX5, SLAMF6, STAT6, TLR1, TLR6, XRCC4                                                                                                                                                                                                                                                                                                                                                                                                     |
| Lymphocyte migration                    | Decreased                  | -2.333             | 0.00128     | BATF, CCL3, CD48, CTLA4, ETV6, JAK3, KCNN4, SH2D3C                                                                                                                                                                                                                                                                                                                                                                                                                                                                                              |
| hematopoiesis of mononuclear leukocytes | Decreased                  | -2.291             | 8.12E-08    | ARID5B, BATF, CCL3, CCND2, CTLA4, ETV6, HLA-DQB1, IFI16, IKZF1, IKZF3, JAK3, LILRB1, LILRB4, PAX5, SLAMF6, STAT6, TLR1, TLR6, XRCC4                                                                                                                                                                                                                                                                                                                                                                                                             |
| cell proliferation of tumor cell lines  | Decreased                  | -2.222             | 0.00602     | ACSL5, CCL3, CCND2, CTLA4, CWC27, DDX21, ETV6, IFI16, IKZF1, JAK3, KCNN4, LILRB1, mir-21, NAT10, NME1, NRAS, PAX5, PPIL1, SH2D3C, SP110                                                                                                                                                                                                                                                                                                                                                                                                         |
| tumorigenesis of tissue                 | Decreased                  | -2.204             | 0.00122     | ABCE1, ALKBH8, AMIGO2, ARHGAP24, ARID5B, BATF, BCAT1, BTN3A3, C3orf38, CCND2, CD180, CD48, CLEC2D, CTLA4, CTPS2, CWC27, DDX21, DDX60, DENND2D, DOCK10, DTX3L, ELK3, EPSTI1, ERCC8, ETV6, FANCF, FCRLA, FYCO1, GARS, GPATCH4, GTF3C6, HERC6, HLA-DQB1, IARS, IFI16, IKZF1, JAK3, KCNN4, KIAA0391, LARS, LARS2, LILRA4, LILRB1, LILRB4, LRRC32, MCTP2, METTL3, mir-21, MTX3, MX2, NAT10, NCF2, NME1, NRAS, NUP205, OAS2, PARP15, PFDN1, PIGK, PPIL1, PYROXD1, RFX5, SH2D3C, SLAMF6, SLC43A3, SMYD5, SNX11, SP110, STAT6, TIFA, TIGIT, TLR1, TLR6, |

|                              |           |       |         |                                                                      |
|------------------------------|-----------|-------|---------|----------------------------------------------------------------------|
|                              |           |       |         | TMEM126A, TMEM140, TRIT1, TXLNB, UPF2, XAF1, ZC3H12D, ZC3H7A, ZNF484 |
| Bacterial Infections         | Increased | 2     | 0.00453 | AIMP1, CCL3, FCMR, SLAMF6, SP110, STAT6, TLR1, TLR6                  |
| hypoplasia of lymphoid organ | Increased | 2.165 | 0.00118 | ARID5B, CTLA4, IKZF1, JAK3, XRCC4                                    |
